# Supplementary material for: In Vitro Culture Expansion Shifts the Immune Phenotype of Human Adipose-Derived Mesenchymal Stem Cells
Source: PubMed Central journal article supplement (PMC7988085; doi:10.3389/fimmu.2021.621744), 2021-03-10
Supplement: DataSheet_1.pdf [file DataSheet_1.pdf]

## Supplementary Materials

### ***In Vitro* Culture Expansion Shifts the Immune Phenotype of Human Adipose-derived Mesenchymal Stem Cells**

**Richard Jeske<sup># 1</sup>, Xuegang Yuan<sup>#1,2,\*</sup>, Qin Fu<sup>1,a</sup>, Bruce A. Bunnell<sup>3</sup>,**

**Timothy M. Logan<sup>4</sup>, Yan Li<sup>1,5,\*</sup>**

1. Department of Chemical & Biomedical Engineering, FAMU-FSU College of Engineering, Florida State University, Tallahassee, FL, United States
2. The National High Magnetic Field Laboratory, Florida State University, Tallahassee, FL, United States
3. Department of Microbiology, Immunology, and Genetics, University of North Texas Health Science Center, Fort Worth, TX, United States
4. Department of Chemistry and Biochemistry, Florida State University, Tallahassee, FL, United States
5. Institute of Molecular Biophysics, Florida State University, Tallahassee, FL, United States

### **Supplementary Figure S1. Flow cytometry analysis of cell cycle distribution of hASCs at P5 and P12.**

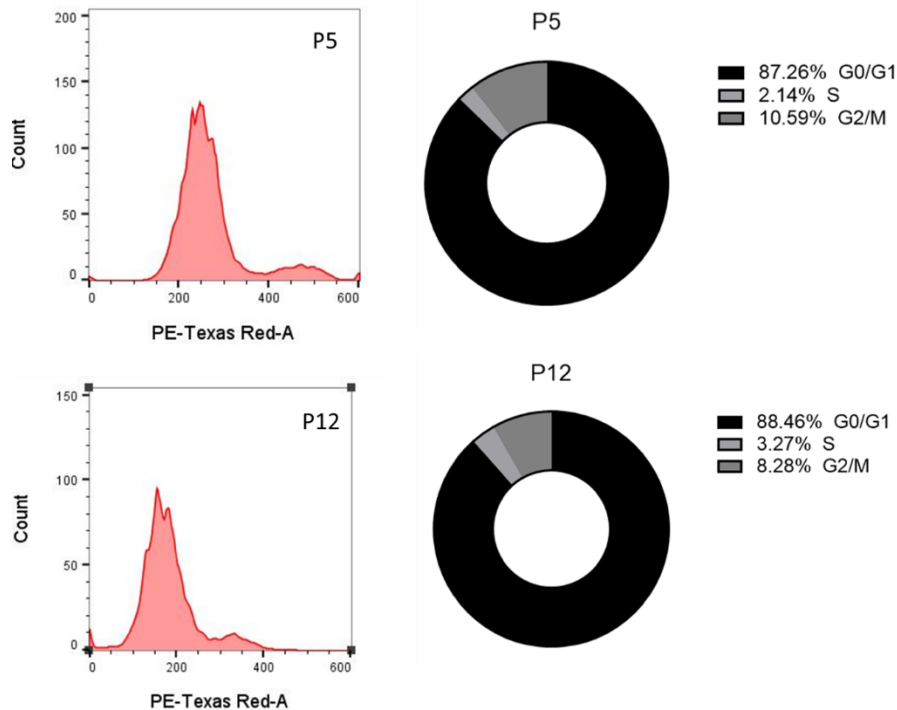

**Supplementary Figure S2. Representative images for adipogenic differentiation and osteogenic differentiation.** (A) Oil red O staining for adipogenic differentiation; and (B) Von Kossa staining for osteogenic differentiation. Scale bar: 100  $\mu$ m.

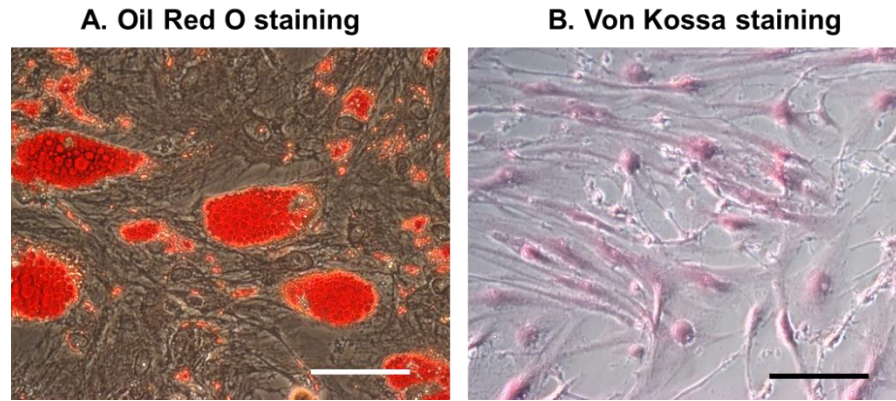

**Supplementary Figure S3. Comparison of M1/M2 macrophages with M0 macrophages to confirm the successful polarization.** The relative mRNA levels of M1 and M2 markers were determined by RT-PCR.

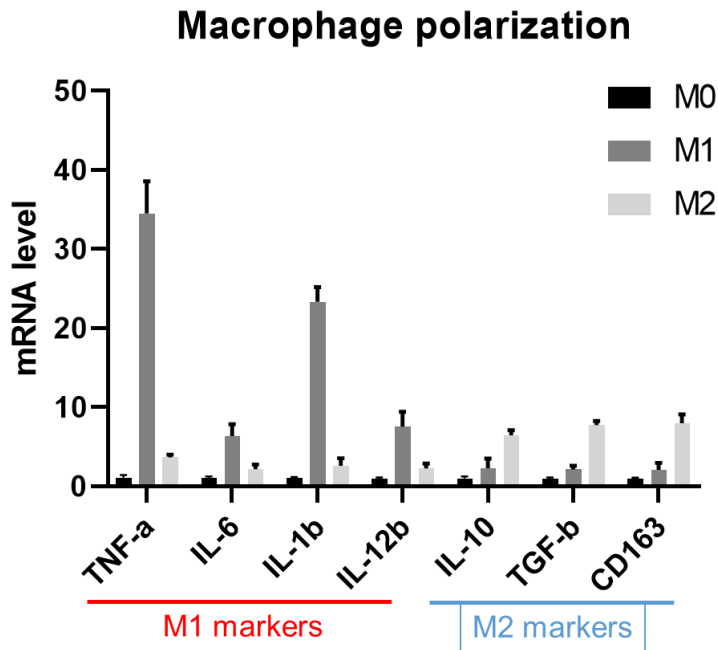

**Supplementary Figure S4. The fold change in cytokine secretion when treated with IFN- $\gamma$  compared to the control (without IFN- $\gamma$  treatment) (corresponding to Figure 4D and 4E).**

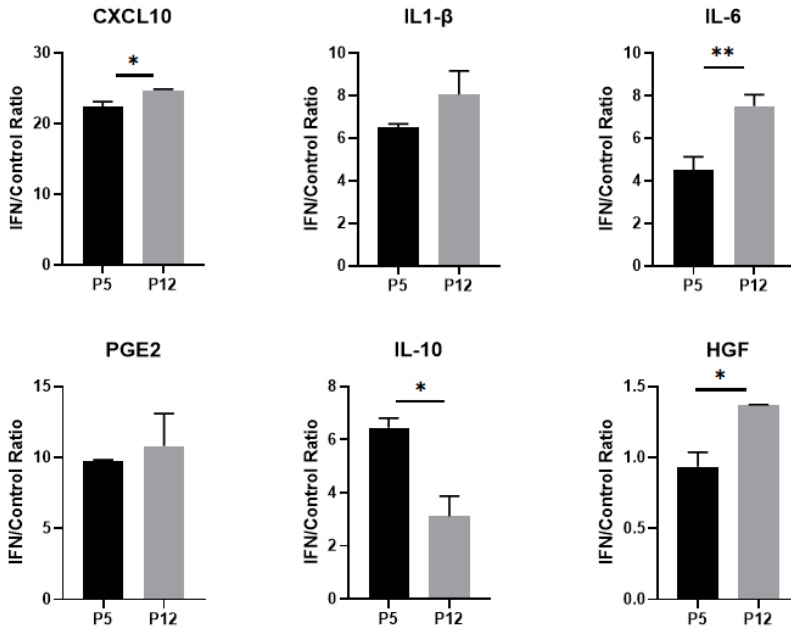

**Supplementary Figure S5. Relative mRNA expression of cell signaling genes for P12 vs. P4 hASCs. \* indicates  $p < 0.05$ .**

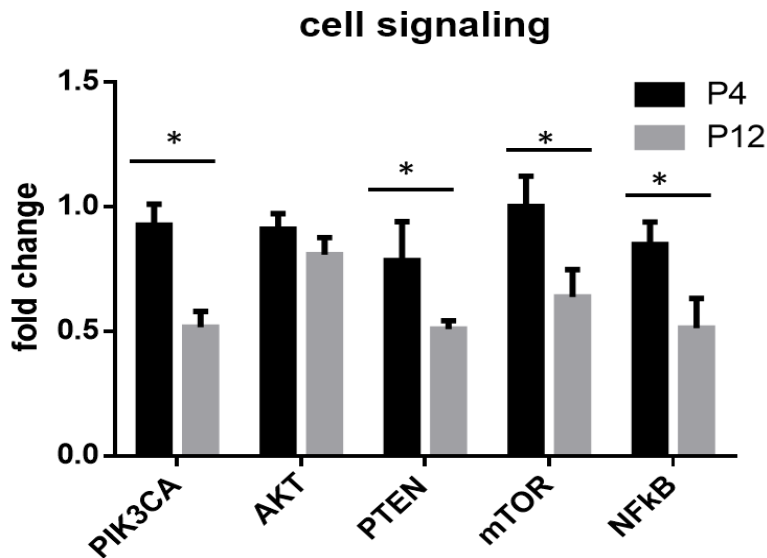

**Supplementary Figure S6. Additional results from transcriptome analysis for P4 vs. P12 differentially expressed genes (DEGs).** (A) Principal component analysis (PCA) demonstrated the separation of hMSCs at P4, P8, and P12 as categorized with the genes identified in transcriptomics. (B) Pericyte-related genes for P4 vs. P12 group. (C) Astrocyte-related genes for P4 vs. P12 group. (D) Microglia-related genes (highly expressed in P4 group or similarly expressed for P4 vs. P12 group). (E) Microglia-related genes (significantly upregulated in P12 group) for P4 vs. P12 group. (F). Extracellular matrix (ECM)-related genes differentially expressed in P4 and P12 groups. The numbers are the Log<sub>2</sub> values of ratios of P12 cells to P4 cells. Negative values indicate that the genes are present in higher amounts in the P4 group, while positive values indicate that the genes are present in higher amounts in the P12 group. The number 1 indicates two-fold increase.

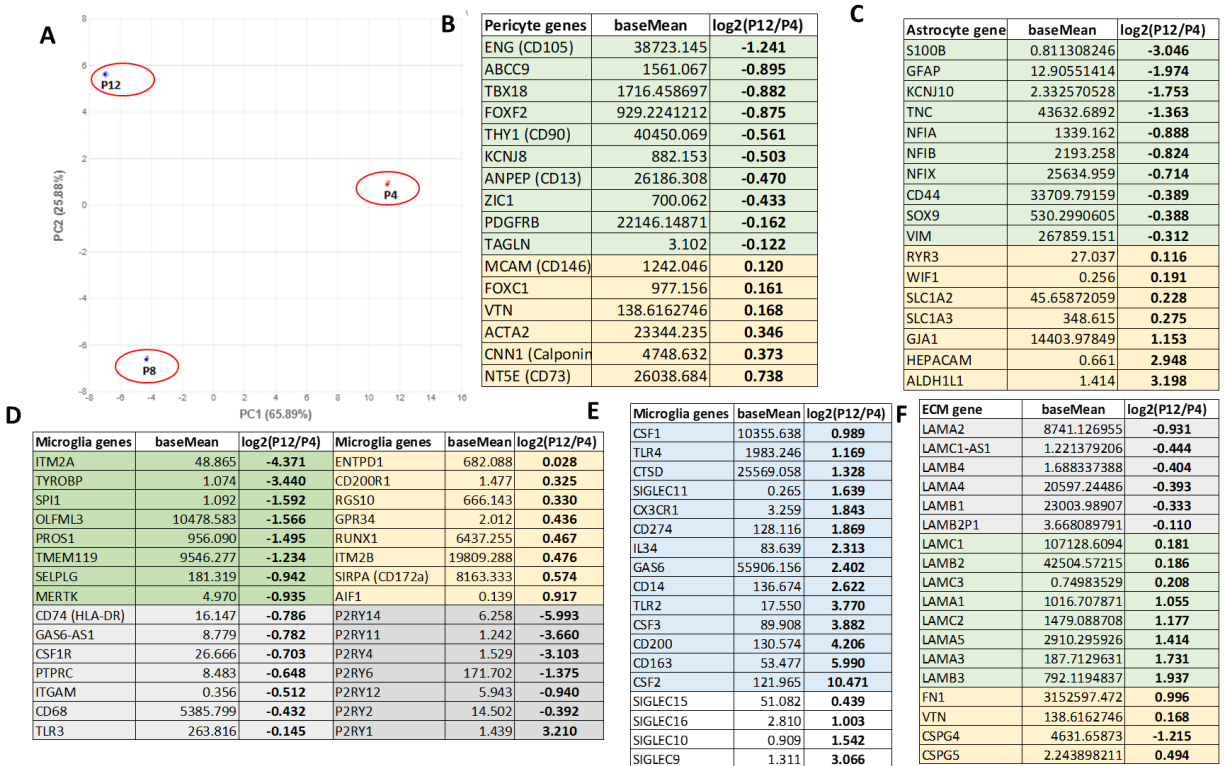

**Supplementary Figure S7. The differential expression of CDK related genes.** (A) P12 vs P4 comparison. (B) P8 vs. P4 comparison. The numbers are the Log<sub>2</sub> values of ratios of P12 or P8 cells to P4 cells. Negative values indicate that the genes are present in higher amounts in the P4 group, while positive values indicate that the genes are present in higher amounts in the P12 or P8 group. The number 1 indicates two-fold increase.

**A**

| CDKs     | baseMean    | log <sub>2</sub> (P12/P4) |
|----------|-------------|---------------------------|
| CDK1     | 952.4750226 | -1.616                    |
| CDK2     | 1525.840086 | -0.707                    |
| CDK5RAP3 | 1885.393652 | -0.635                    |
| CDK5R2   | 1.325657851 | -0.542                    |
| CDK15    | 498.9790924 | -0.489                    |
| CDK11B   | 2548.143836 | -0.416                    |
| CDK16    | 6618.662043 | -0.317                    |
| CDK2AP1  | 17654.9712  | -0.254                    |
| CDK10    | 1171.946976 | -0.254                    |
| CDK12    | 2850.469724 | -0.239                    |
| CDK9     | 2128.767777 | -0.207                    |
| CDK5     | 597.4168291 | -0.159                    |
| CDK19    | 871.6929315 | -0.149                    |
| CDK5RAP2 | 2192.176754 | -0.143                    |
| CDK8     | 1027.590743 | -0.070                    |
| CDK5RAP1 | 629.5394949 | -0.061                    |
| CDK13    | 2321.256303 | 0.065                     |
| CDK4     | 3857.34302  | 0.095                     |
| CDK7     | 1295.525634 | 0.232                     |
| CDK14    | 3006.119183 | 0.327                     |
| CDK18    | 29.27011385 | 0.405                     |
| CDK11A   | 664.4656778 | 0.439                     |
| CDK2AP2  | 1609.455423 | 0.756                     |
| CDK17    | 2106.155631 | 0.789                     |
| CDK20    | 280.2641336 | 0.849                     |
| CDK6     | 4215.75467  | 0.851                     |
| CDK5R1   | 182.5135189 | 0.971                     |

**B**

| CDKs     | baseMean  | log <sub>2</sub> (P8/P4) |
|----------|-----------|--------------------------|
| CDK1     | 864.92042 | -2.417                   |
| CDK2     | 1309.3479 | -1.469                   |
| CDK5RAP3 | 1848.4298 | -0.715                   |
| CDK10    | 1085.902  | -0.558                   |
| CDK11B   | 2592.4577 | -0.415                   |
| CDKL1    | 148.88681 | -0.402                   |
| CDK2AP1  | 17381.029 | -0.356                   |
| CDK11A   | 517.57515 | -0.315                   |
| CDK5R2   | 1.491666  | -0.257                   |
| CDK5RAP1 | 615.27473 | -0.210                   |
| CDK5     | 598.6013  | -0.199                   |
| CDK9     | 2203.2784 | -0.148                   |
| CDK16    | 7148.7493 | -0.130                   |
| CDK5RAP2 | 2313.4319 | -0.041                   |
| CDK12    | 3102.2201 | -0.035                   |
| CDK2AP2  | 1238.0307 | -0.001                   |
| CDK4     | 3807.1458 | 0.012                    |
| CDK20    | 208.24041 | 0.064                    |
| CDK15    | 611.80386 | 0.095                    |
| CDK13    | 2438.1369 | 0.143                    |
| CDK5R1   | 132.39873 | 0.150                    |
| CDK7     | 1294.5284 | 0.188                    |
| CDK18    | 27.933153 | 0.233                    |
| CDK14    | 3083.1923 | 0.345                    |
| CDKAL1   | 328.92719 | 0.381                    |
| CDK8     | 1234.3665 | 0.383                    |
| CDK19    | 1095.6397 | 0.436                    |
| CDK17    | 1910.6925 | 0.519                    |
| CDKL5    | 658.37766 | 0.633                    |
| CDK6     | 3907.5991 | 0.635                    |
| CDKL3    | 54.023247 | 0.922                    |
| CDKL2    | 2.1456202 | 1.338                    |
| CDKL4    | 1.8742296 | 1.341                    |

**Supplementary Figure S8. Additional results from transcriptome analysis for P4 vs. P12 DEGs.** (A) Genes related to HLA molecules. (B) Genes related to IGF family; (C) Genes related to BMP family; (D) Genes related to TNF family; (E) Genes related to Sirt family; (F) Genes related to HOXB family.

The numbers are the Log2 values of ratios of P12 cells to P4 cells. Negative values indicate that the genes are present in higher amounts in the P4 group, while positive values indicate that the genes are present in higher amounts in the P12 group. The number 1 indicates two-fold increase.

| <b>A</b>  |          |              | <b>B</b>   |             |              | <b>C</b>   |          |              | <b>D</b>        |             |              |
|-----------|----------|--------------|------------|-------------|--------------|------------|----------|--------------|-----------------|-------------|--------------|
| HLA mole. | baseMean | log2(P12/P4) | IGF family | baseMean    | log2(P12/P4) | BMP family | baseMean | log2(P12/P4) | TNF family      | baseMean    | log2(P12/P4) |
| HLA-F-AS1 | 43.77147 | -1.235       | IGF1       | 869.1093976 | -5.581       | BMP6       | 2108.286 | -0.627       | TNFRSF18        | 2.817383607 | -4.025       |
| HLA-DOB   | 6.647761 | -0.703       | IGFLR1     | 60.36906922 | -1.906       | BMP8B      | 3.640394 | -0.574       | TNFRSF13C       | 3.456440663 | -2.905       |
| HLA-DPA1  | 129.0556 | -0.569       | IGFBP4     | 135072.1545 | -1.396       | BMP8A      | 18.27488 | -0.386       | TNFRSF11A       | 35.78336718 | -2.349       |
| HLA-DPB1  | 122.2067 | -0.173       | IGFBP6     | 25133.20754 | -0.647       | BMPR2      | 6761.8   | -0.287       | TNFRSF4         | 0.6158154   | -1.538       |
| HLA-E     | 16659.19 | 0.119        | IGF1R      | 4092.516875 | 0.333        | BMPR1A     | 2000.509 | -0.114       | TNFAIP8L2       | 1.307279355 | -1.205       |
| HLA-DRB1  | 1.758995 | 0.608        | IGF2BP1    | 975.3617673 | 0.442        | BMP1       | 8880.817 | -0.100       | TNFRSF19        | 653.8814426 | -1.118       |
| HLA-DMA   | 97.56198 | 0.644        | IGFBP3     | 411339.0225 | 0.442        | BMP2K      | 901.6841 | 0.192        | TNFRSF25        | 110.1173648 | -1.064       |
| HLA-C     | 39423.42 | 1.051        | IGF2BP2    | 4113.9674   | 0.774        | BMPR1B     | 244.0678 | 0.759        | TNFAIP8L1       | 263.6274254 | -0.993       |
| HLA-F     | 1141.597 | 1.081        | IGF2R      | 15376.79686 | 0.976        | BMP4       | 155.0661 | 1.179        | TNFSF12-TNFSF13 | 32.25616217 | -0.992       |
| HLA-V     | 6.257282 | 1.237        | IGFBP7-AS1 | 4.305984467 | 1.018        | BMP3       | 3.675563 | 1.288        | TNFSF13B        | 120.2761215 | -0.943       |
| HLA-A     | 36981.53 | 1.321        | IGFBP1     | 164.863802  | 1.066        | BMPER      | 4072.712 | 1.721        | TNFRSF1A        | 9809.22317  | -0.528       |
| HLA-B     | 33961.32 | 1.797        | IGFBP1     | 13.173016   | 1.202        | BMP2       | 70.67927 | 2.199        | TNFAIP8         | 745.2096742 | -0.407       |
| HLA-L     | 143.7689 | 1.939        | IGFBP7     | 54106.13298 | 1.494        |            |          |              | TNFSF12         | 1061.483972 | -0.161       |
| HLA-H     | 2857.198 | 2.685        | IGFBP5     | 192195.6806 | 1.564        |            |          |              | TNFRSF17        | 0.498982471 | 0.166        |
| HLA-DMB   | 0.82848  | 3.260        | IGF2       | 1301.942909 | 1.685        |            |          |              | TNFRSF14        | 451.7659646 | 0.267        |
| HLA-J     | 15.39483 | 3.611        | IGFN1      | 14.16057657 | 2.019        |            |          |              | TNFRSF8         | 40.66739948 | 0.314        |
| HLA-G     | 89.24683 | 3.814        | IGF2BP3    | 394.7769587 | 3.035        |            |          |              | TNFSF13         | 200.1672166 | 0.368        |
|           |          |              | IGF2-AS    | 3.029705344 | 3.576        |            |          |              | TNFAIP2         | 3741.234598 | 0.417        |
|           |          |              | IGFBP2     | 172.6736262 | 4.185        |            |          |              | TNFSF9          | 575.2855043 | 0.419        |

  

| <b>E</b>    |             |              | <b>F</b>    |             |              |
|-------------|-------------|--------------|-------------|-------------|--------------|
| SIRT family | baseMean    | log2(P12/P4) | HOXB family | baseMean    | log2(P12/P4) |
| SIRT1       | 1151.256524 | -0.163       | HOXB13      | 79.27192014 | -4.333       |
| SIRT7       | 495.5490563 | -0.125       | HOXB2       | 1850.519974 | 0.380        |
| SIRT3       | 617.401115  | -0.087       | HOXB3       | 1338.926444 | 0.595        |
| SIRT5       | 356.3647251 | -0.079       | HOXB4       | 501.5388577 | 0.568        |
| SIRT6       | 913.6728866 | 0.037        | HOXB5       | 338.8508101 | 1.042        |
| SIRT2       | 1896.887045 | 0.066        | HOXB6       | 440.8451823 | 0.797        |
| SIRT4       | 31.89167153 | 0.630        | HOXB7       | 563.1165311 | 1.341        |
|             |             |              | HOXB8       | 135.6717927 | 3.748        |
|             |             |              | HOXB9       | 225.5430772 | 2.932        |

  

|           |             |       |
|-----------|-------------|-------|
| TNFRSF10A | 185.6879216 | 3.777 |
| TNFSF8    | 2.688279237 | 4.205 |
| TNFSF18   | 2.947932439 | 5.099 |
| TNFSF4    | 893.1020063 | 5.473 |

**Supplementary Figure S9. Additional results from transcriptome analysis for P4 vs. P12 DEGs.** (A) Genes related to collagen molecules. (B) Genes related to metabolism; (C) Genes related to CD markers; (D) Additional genes related to CD markers.

The numbers are the Log2 values of ratios of P12 cells to P4 cells. Negative values indicate that the genes are present in higher amounts in the P4 group, while positive values indicate that the genes are present in higher amounts in the P12 group. The number 1 indicates two-fold increase.

| A          |             |              |           |          |              | B               |              |                |              |  |
|------------|-------------|--------------|-----------|----------|--------------|-----------------|--------------|----------------|--------------|--|
| Collagens  | baseMean    | log2(P12/P4) | Collagens | baseMean | log2(P12/P4) | Metablism genes |              |                |              |  |
|            |             |              |           |          |              | GeneName        | log2(P12/P4) | GeneName       | log2(P12/P4) |  |
| COL22A1    | 18.16699548 | -5.464       | COL12A1   | 161294.4 | 0.237        | FASN            | -1.534       | MDH1           | 0.206        |  |
| COL9A3     | 40.62497878 | -5.363       | COL6A1    | 268983.9 | 0.310        | G6PD            | -1.155       | ACO1           | 0.233        |  |
| COL14A1    | 4195.637739 | -4.004       | COL6A2    | 239605.1 | 0.410        | IDH1            | -1.033       | SLC25A11       | 0.239        |  |
| COL21A1    | 50.17505599 | -3.219       | COL4A5    | 113.8265 | 0.696        | OGDH            | -0.831       | PKM            | 0.271        |  |
| COL5A1-AS1 | 0.839783824 | -2.119       | COL18A1   | 3505.806 | 0.759        | IDH2            | -0.647       | GAPDH          | 0.394        |  |
| COL9A2     | 88.25097468 | -1.740       | COL4A2    | 72964.59 | 0.911        | ACAA1           | -0.624       | ALDOC          | 0.537        |  |
| COL6A6     | 45.04364395 | -1.595       | COL2A1    | 1.400271 | 1.040        | SLC38A2         | -0.553       | ENO1           | 0.543        |  |
| COL28A1    | 2.643228221 | -1.594       | COL4A1    | 64428.23 | 1.130        | PDHA1           | -0.405       | GOT1           | 0.560        |  |
| COL5A3     | 6343.384109 | -1.420       | COL7A1    | 1263.731 | 1.367        | GOT2            | -0.361       | ALDOA          | 0.562        |  |
| COL1A1     | 2862050.39  | -1.199       | COL11A1   | 13442.38 | 1.510        | IDH3B           | -0.330       | GPI            | 0.613        |  |
| COL4A6     | 5.960923388 | -0.990       | COL13A1   | 1014.179 | 1.515        | SDHA            | -0.314       | LDHA           | 0.699        |  |
| COL3A1     | 612010.0978 | -0.881       | COL8A2    | 2627.548 | 1.731        | SLC25A1         | -0.161       | PGM1           | 0.742        |  |
| COL1A2     | 1383521.724 | -0.832       | COL10A1   | 35.26074 | 2.021        | ACO2            | -0.100       | PGAM1          | 0.747        |  |
| COL24A1    | 18.28113159 | -0.731       | COL15A1   | 3282.041 | 2.039        | FH              | -0.031       | GFPT1          | 0.904        |  |
| COL5A1     | 229666.6541 | -0.443       | COL4A3    | 11.02153 | 2.277        | GLUD1           | -0.013       | GFPT1          | 0.904        |  |
| COL17A1    | 22.47471159 | -0.415       | COL8A1    | 14326.77 | 2.395        | SUCLA2          | -0.012       | PGK1           | 1.481        |  |
| COL11A2    | 49.67347745 | -0.239       | COL23A1   | 0.530382 | 2.628        | PFKL            | 0.176        | PDK1           | 1.597        |  |
| COL6A3     | 153382.6586 | 0.041        | COL26A1   | 2.621529 | 2.695        | SLC1A5          | 0.194        | HK2            | 1.996        |  |
| COL16A1    | 44231.51486 | 0.061        | COL4A4    | 142.2575 | 2.844        | MDH2            | 0.206        | SLC2A1 (GLUT1) | 3.213        |  |
| COL27A1    | 1239.143323 | 0.163        | COL25A1   | 19.53168 | 3.726        |                 |              |                |              |  |
| COL5A2     | 97022.05758 | 0.220        |           |          |              |                 |              |                |              |  |

  

| C          |           |              |            |           |              | D     |           |        |       |          |       |
|------------|-----------|--------------|------------|-----------|--------------|-------|-----------|--------|-------|----------|-------|
| CD Markers | baseMean  | log2(P12/P4) | CD Markers | baseMean  | log2(P12/P4) | CD79A | 6.220     | -0.525 | CD40  | 66.642   | 1.678 |
| CD24       | 74.361    | -4.515       | CD200R1    | 1.477     | 0.325        | CD99  | 27769.293 | -0.510 | CD80  | 2.742    | 1.821 |
| CD37       | 0.731     | -2.880       | CD47       | 3883.016  | 0.468        | CD109 | 9798.364  | -0.482 | CD274 | 128.116  | 1.869 |
| CD300C     | 3.335     | -2.381       | CD46       | 4054.915  | 0.476        | CD27  | 7.266     | -0.446 | CD22  | 2.281    | 1.888 |
| CD93       | 5.272     | -1.770       | CD276      | 10594.922 | 0.557        | CD101 | 8.414     | -0.434 | CD55  | 3544.863 | 1.956 |
| CD81-AS1   | 11.515    | -1.620       | CD2AP      | 1768.409  | 0.687        | CD68  | 5385.799  | -0.432 | CD177 | 17.316   | 2.167 |
| CD248      | 68550.584 | -1.334       | CD36       | 5299.353  | 0.717        | CD207 | 0.620     | -0.399 | CD14  | 136.674  | 2.622 |
| CD160      | 4.726     | -1.322       | CD302      | 911.640   | 0.732        | CD44  | 33709.792 | -0.389 | CD28  | 3.585    | 2.710 |
| CD38       | 49.629    | -0.930       | CD58       | 337.553   | 1.011        | CD34  | 328.603   | -0.251 | CD82  | 1140.020 | 3.048 |
| CD4        | 10.283    | -0.915       | CD19       | 1.768     | 1.044        | CD59  | 53760.170 | -0.247 | CD83  | 87.724   | 3.141 |
| CD74       | 16.147    | -0.786       | CD9        | 3190.723  | 1.155        | CD81  | 33227.582 | -0.088 | CD200 | 130.574  | 4.206 |
| CD96       | 3.936     | -0.716       | CD70       | 60.406    | 1.340        | CD63  | 43238.708 | -0.012 | CD163 | 53.477   | 5.990 |
| CD226      | 5.230     | -0.658       | CD72       | 22.843    | 1.450        |       |           |        |       |          |       |
| CD320      | 1875.124  | -0.565       | CD163L1    | 79.339    | 1.460        |       |           |        |       |          |       |

**Supplementary Figure S10. Corresponding to Figure 5: results from transcriptome analysis for P4 vs. P8 DEGs.** (A) Interleukin mRNA expression (shown in fold change) for P8 vs. P4 hASCs, showing upregulation at P8. (B) Chemokine mRNA expression (shown in fold change) for P8 vs. P4 hASCs, showing upregulation at P8. (C) Integrin mRNA expression for P8 vs. P4 hASCs. (D) Growth factor mRNA expression (TGF, PDGF, and VEGF) for P8 vs. P4 hASCs. (E) Matrix metalloproteinase (MMP) mRNA expression for P8 vs. P4 hASCs.

The numbers are the Log2 values of ratios of P12 cells to P4 cells. Negative values indicate that the genes are present in higher amounts in the P4 group, while positive values indicate that the genes are present in higher amounts in the P12 group. The number 1 indicates two-fold increase.

| A Chemokines |           |             | B Cytokines |             |             | C Integrins |             |             |
|--------------|-----------|-------------|-------------|-------------|-------------|-------------|-------------|-------------|
| GeneName     | baseMean  | log2(P8/P4) | GeneName    | baseMean    | log2(P8/P4) | GeneName    | baseMean    | log2(P8/P4) |
| CCL11        | 27.307268 | 4.980       | CXCL2       | 1885.990883 | 4.934       | ITGA10      | 633.4072812 | -2.913      |
| CCL3L3       | 2.3506537 | 4.746       | CXCL8       | 5184.075441 | 3.763       | ITGA7       | 1143.990523 | -2.563      |
| CCL5         | 1391.541  | 4.575       | CXCL3       | 429.7851775 | 3.328       | ITGA9       | 74.49356566 | -2.172      |
| CCL3         | 3.3570674 | 4.489       | CXCL11      | 42.77240795 | 2.142       | ITGA6       | 1795.1382   | -1.336      |
| CCL20        | 42.763076 | 3.569       | CXCL1       | 2490.328263 | 1.845       | ITGB1BP2    | 24.12172822 | -1.302      |
| CCL7         | 25.718934 | 2.234       | CXCL16      | 242.3919335 | 1.790       | ITGA8       | 513.1237266 | -1.195      |
| CCL2         | 3247.7936 | 2.226       | CXCL5       | 554.2751933 | 1.387       | ITGA9-AS1   | 11.73507402 | -1.156      |
| CCL28        | 53.862767 | 2.189       | CXCL10      | 101.1402488 | 1.202       | ITGB3BP     | 231.7241597 | -0.996      |
| CCL26        | 48.619602 | 1.681       | CXCL6       | 1572.1913   | 0.721       | ITGA E      | 279.4912276 | -0.671      |
| CX3CR1       | 3.4016833 | 1.885       | CXCL12      | 14091.81796 | -2.349      | ITGB1BP1    | 2042.304913 | -0.313      |
|              |           |             | CXCL14      | 8.570047589 | -2.666      | ITGB5       | 172386.5645 | -0.162      |
|              |           |             |             |             |             | ITGB5       | 24092.539   | -0.136      |
|              |           |             |             |             |             | ITGA3       | 2506.707543 | 0.129       |
|              |           |             |             |             |             | ITGA5       | 48071.30203 | 0.264       |
|              |           |             |             |             |             | ITGA4       | 6691.113382 | 0.330       |
|              |           |             |             |             |             | ITGA2       | 910.9906176 | 0.346       |
|              |           |             |             |             |             | ITGA1       | 2565.508841 | 0.597       |
|              |           |             |             |             |             | ITGB3       | 700.307449  | 0.760       |
|              |           |             |             |             |             | ITGBL1      | 25898.49686 | 0.940       |
|              |           |             |             |             |             | ITGB8       | 1065.606965 | 1.177       |
|              |           |             |             |             |             | ITGA11      | 40755.38067 | 1.836       |
|              |           |             |             |             |             | ITGB2       | 9.709580575 | 1.917       |

  

| D        |             |             | E MMP family  |           |             |
|----------|-------------|-------------|---------------|-----------|-------------|
| GeneName | baseMean    | log2(P8/P4) | GeneName      | baseMean  | log2(P8/P4) |
| TGFB3    | 1090.357848 | -2.097      | MMP16         | 604.94654 | -1.533      |
| TGFB3    | 2721.716799 | -0.853      | MMP24         | 271.11627 | -1.274      |
| TGFB1    | 7841.832536 | -0.488      | MMP3          | 742.92811 | -1.237      |
| TGFB11   | 6120.548596 | -0.212      | MMP15         | 132.43375 | -1.123      |
| TGFB1    | 369079.1314 | -0.095      | MMP11         | 136.35719 | -0.544      |
| TGFBRAP1 | 1323.867685 | 0.444       | MMP24OS       | 5224.9024 | -0.368      |
| TGFB3L   | 66.62571074 | 1.077       | MMP19         | 1833.5683 | -0.356      |
| TGFB1    | 6267.961718 | 1.227       | MMP14         | 53104.542 | 0.187       |
| TGFB2    | 324.059582  | 3.019       | MMP17         | 1463.3863 | 0.232       |
| PDGFD    | 1239.98333  | -0.795      | MMP2          | 113012.66 | 0.689       |
| PDGFRA   | 19866.81299 | -0.442      | MMP1          | 467.22114 | 0.816       |
| PDGFRB   | 25818.21028 | 0.229       | MMP24-AS1-ED1 | 61.500276 | 0.897       |
| PDGFC    | 2409.816128 | 0.578       | MMP25-AS1     | 71.926243 | 0.915       |
| PDGFA    | 584.5553859 | 1.938       | MMP23B        | 463.88045 | 1.754       |
| VEGFB    | 2945.252126 | 0.521       | MMP9          | 14.467134 | 2.843       |
| VEGFC    | 5767.382571 | 0.838       | MMP28         | 5.5421294 | 2.987       |
| VEGFA    | 12736.36066 | 2.978       | MMP8          | 4.9968554 | 3.674       |



**Supplementary Figure S11. Additional results from transcriptome analysis for P4 vs. P8 DEGs.** (A) Pericyte-related genes for P4 vs. P8 group. (B) Astrocyte-related genes for P4 vs. P8 group. (C) Genes related to IGF family; (D) Genes related to HLA molecules; (E) Microglia-related genes (highly expressed in P4 group or similarly expressed for P4 vs. P8 group). (F) Additional microglia-related genes (significantly upregulated in P8 group) for P4 vs. P8 group.

The numbers are the Log2 values of ratios of P12 cells to P4 cells. Negative values indicate that the genes are present in higher amounts in the P4 group, while positive values indicate that the genes are present in higher amounts in the P12 group. The number 1 indicates two-fold increase.

| A               |             |               | B               |           |               | C          |           |               | D          |           |               |
|-----------------|-------------|---------------|-----------------|-----------|---------------|------------|-----------|---------------|------------|-----------|---------------|
| Pericyte genes  | baseMean    | log2(P8/P4)   | Astrocyte genes | baseMean  | log2(P8/P4)   | IGF family | baseMean  | log2(P8/P4)   | HLA family | baseMean  | log2(P8/P4)   |
| MCAM (CD146)    | 873.9260078 | <b>-1.163</b> | S100B           | 0.8278594 | <b>-3.103</b> | IGFN1      | 3.1147434 | <b>-3.438</b> | HLA-F-AS1  | 46.508011 | <b>-0.554</b> |
| KCNJ8           | 779.1072067 | <b>-1.057</b> | KCNJ10          | 2.3269112 | <b>-1.828</b> | IGF1       | 950.29354 | <b>-2.828</b> | HLA-E      | 19274.416 | <b>0.460</b>  |
| ENG (CD105)     | 41156.06522 | <b>-1.050</b> | GFAP            | 14.007791 | <b>-1.411</b> | IGFBP4     | 138000.82 | <b>-1.398</b> | HLA-G      | 25.908068 | <b>1.726</b>  |
| TBX18           | 1881.090216 | <b>-0.594</b> | NFIA            | 1381.1178 | <b>-0.835</b> | IGFLR1     | 72.843573 | <b>-0.932</b> | HLA-F      | 1663.3242 | <b>1.789</b>  |
| ZIC1            | 683.1527067 | <b>-0.587</b> | RYR3            | 21.324956 | <b>-0.701</b> | IGFBP6     | 32914.736 | <b>0.138</b>  | HLA-A      | 49359.42  | <b>1.840</b>  |
| FOXF2           | 1040.353649 | <b>-0.546</b> | VIM             | 247854.46 | <b>-0.649</b> | IGF1R      | 4109.8911 | <b>0.299</b>  | HLA-C      | 62319.115 | <b>1.908</b>  |
| VTN             | 115.0754843 | <b>-0.435</b> | WIF1            | 0.1193208 | <b>-0.583</b> | IGF2BP1    | 940.45655 | <b>0.306</b>  | HLA-L      | 149.72705 | <b>1.981</b>  |
| THY1 (CD90)     | 42730.91239 | <b>-0.418</b> | CD44            | 33621.445 | <b>-0.456</b> | IGF2BP3    | 100.30526 | <b>0.373</b>  | HLA-H      | 2167.05   | <b>2.178</b>  |
| ACTA2           | 19165.13889 | <b>-0.277</b> | SOX9            | 554.51307 | <b>-0.312</b> | IGF2R      | 13661.302 | <b>0.672</b>  | HLA-B      | 48721.491 | <b>2.404</b>  |
| CNN1 (Calponin) | 3896.575462 | <b>-0.232</b> | NFIX            | 29611.134 | <b>-0.283</b> | IGF2BP2    | 4229.401  | <b>0.800</b>  | HLA-V      | 12.611372 | <b>2.497</b>  |
| ANPEP (CD13)    | 29006.30738 | <b>-0.186</b> | SLC1A2          | 44.799152 | <b>0.110</b>  | IGFBP7     | 41457.545 | <b>0.895</b>  | HLA-J      | 33.145076 | <b>4.750</b>  |
| ABCC9           | 2088.470909 | <b>0.035</b>  | SLC1A3          | 339.3898  | <b>0.193</b>  | IGFBP3     | 560598.41 | <b>1.106</b>  |            |           |               |
| TAGLN           | 132897.7755 | <b>0.094</b>  | NFIB            | 3120.127  | <b>0.246</b>  | IGFBP5     | 171968.46 | <b>1.311</b>  |            |           |               |
| PDGFRB          | 25818.21028 | <b>0.229</b>  | TNC             | 75310.774 | <b>0.445</b>  | IGF2       | 1151.01   | <b>1.401</b>  |            |           |               |
| NT5E (CD73)     | 24614.90167 | <b>0.560</b>  | GJA1            | 13521.622 | <b>0.980</b>  | IGFBP2     | 42.736512 | <b>1.865</b>  |            |           |               |
| FOXO1           | 1448.645716 | <b>1.047</b>  | ALDH1L1         | 0.5035779 | <b>1.435</b>  |            |           |               |            |           |               |
|                 |             |               | HEPACAM         | 0.3943449 | <b>2.169</b>  |            |           |               |            |           |               |

  

| E               |           |               | F               |             |               |
|-----------------|-----------|---------------|-----------------|-------------|---------------|
| Microglia genes | baseMean  | log2(P8/P4)   | Microglia genes | baseMean    | log2(P8/P4)   |
| SPI1            | 0.8467581 | <b>-3.128</b> | TLR3            | 302.6554057 | <b>0.200</b>  |
| ITM2A           | 60.124383 | <b>-2.063</b> | GPR34           | 1.940852482 | <b>0.329</b>  |
| TYROBP          | 1.3654746 | <b>-1.989</b> | ITM2B           | 20646.43105 | <b>0.539</b>  |
| GAS6-AS1        | 7.2532602 | <b>-1.828</b> | CD74 (HLA-DR)   | 25.99002444 | <b>0.616</b>  |
| ITGAM           | 0.2285244 | <b>-1.284</b> | CD200R1         | 1.846806044 | <b>0.625</b>  |
| MERTK           | 4.8751891 | <b>-1.092</b> | RUNX1           | 7207.822949 | <b>0.682</b>  |
| OLFML3          | 11923.391 | <b>-0.997</b> | SIRPA (CD172a)  | 9762.472758 | <b>0.950</b>  |
| CSF1R           | 27.002647 | <b>-0.712</b> | AIF1            | 0.000       | <b>NA</b>     |
| PROS1           | 1166.4418 | <b>-0.678</b> | P2RY14          | 6.701       | <b>-4.650</b> |
| SELPLG          | 211.69131 | <b>-0.415</b> | P2RY11          | 1.270       | <b>-3.720</b> |
| TMEM119         | 12249.937 | <b>-0.334</b> | P2RY4           | 1.558       | <b>-3.156</b> |
| ENTPD1          | 616.30073 | <b>-0.330</b> | P2RY6           | 170.318     | <b>-1.536</b> |
| CD68            | 5812.4687 | <b>-0.228</b> | P2RY2           | 12.924      | <b>-0.883</b> |
| PTPRC           | 9.9719904 | <b>-0.158</b> | P2RY12          | 6.403       | <b>-0.729</b> |
| RGS10           | 631.9165  | <b>0.146</b>  | P2RY1           | 0.749       | <b>2.125</b>  |

  

| Microglia genes | baseMean | log2(P8/P4)   |
|-----------------|----------|---------------|
| TLR4            | 1425.179 | <b>0.373</b>  |
| CSF1            | 8806.659 | <b>0.570</b>  |
| CTS5            | 18969.61 | <b>0.637</b>  |
| GAS6            | 26293.38 | <b>0.923</b>  |
| CD274           | 88.93981 | <b>1.094</b>  |
| IL34            | 57.65796 | <b>1.604</b>  |
| SIGLEC11        | 0.275384 | <b>1.626</b>  |
| TLR2            | 5.372007 | <b>1.764</b>  |
| CX3CR1          | 3.401683 | <b>1.885</b>  |
| CD14            | 112.1942 | <b>2.277</b>  |
| CSF3            | 50.5019  | <b>2.943</b>  |
| CD200           | 67.63061 | <b>3.155</b>  |
| CD163           | 18.056   | <b>4.356</b>  |
| CSF2            | 7.801062 | <b>6.479</b>  |
| SIGLEC15        | 26.81242 | <b>-2.294</b> |
| SIGLEC16        | 2.572308 | <b>0.755</b>  |
| SIGLEC10        | 0.377671 | <b>-0.567</b> |
| SIGLEC9         | 0.250838 | <b>0.140</b>  |

**Supplementary Figure S12. Additional results from transcriptome analysis for P4 vs. P8 DEGs.** (A) Collagen-related genes for P4 vs. P8 group. (B) Laminin-related genes for P4 vs. P8 group. (C) Genes related to metabolism (no significant change); (D) Genes related to HLA molecules; (E) Genes related to CD markers for P4 vs. P8 group. (F) Additional genes related to CD markers for P4 vs. P8 group.

The numbers are the Log2 values of ratios of P12 cells to P4 cells. Negative values indicate that the genes are present in higher amounts in the P4 group, while positive values indicate that the genes are present in higher amounts in the P12 group. The number 1 indicates two-fold increase.

| A              |             |             | B        |           |             | C          |             |               |             |
|----------------|-------------|-------------|----------|-----------|-------------|------------|-------------|---------------|-------------|
| Collagen genes | baseMean    | log2(P8/P4) | Laminins |           |             | Metabolism |             |               |             |
|                |             |             | ECM gene | baseMean  | log2(P8/P4) | GeneName   | log2(P8/P4) | GeneName      | log2(P8/P4) |
| COL22A1        | 19.02668966 | -4.290      | IAMA2    | 10409.852 | -0.348      | FASN       | -1.713      | PKM           | 0.008       |
| COL28A1        | 2.15654904  | -3.670      | IAMB4    | 1.9424711 | -0.240      | OGDH       | -1.104      | SUCLA2        | 0.018       |
| COL17A1        | 14.47717403 | -3.182      | IAMA5    | 1562.7417 | -0.124      | G6PD       | -0.980      | PFKL          | 0.260       |
| COL6A6         | 39.05414512 | -2.885      | IAMA1    | 684.37834 | 0.056       | IDH2       | -0.747      | ALDOC         | 0.311       |
| COL21A1        | 61.78972475 | -1.975      | IAMB2P1  | 3.9517584 | 0.062       | SLC38A2    | -0.544      | GAPDH         | 0.372       |
| COL9A3         | 53.37389936 | -1.716      | IAMA4    | 24891.186 | 0.111       | IDH1       | -0.534      | GPI           | 0.419       |
| COL14A1        | 5330.296083 | -1.612      | IAMC2    | 1015.8622 | 0.262       | IDH3B      | -0.502      | LDHA          | 0.502       |
| COLC12         | 3251.779381 | -1.496      | IAMB2    | 45049.492 | 0.301       | PDHA1      | -0.489      | ALDOA         | 0.555       |
| COL9A2         | 95.30564992 | -1.446      | IAMC1    | 117365.62 | 0.375       | SDHA       | -0.465      | PGM1          | 0.580       |
| COLGALT1       | 16081.32484 | -0.490      | IAMB3    | 390.67252 | 0.426       | SLC25A1    | -0.458      | GFPT1         | 0.589       |
| COL5A3         | 8683.017178 | -0.254      | IAMB1    | 30549.548 | 0.427       | GOT2       | -0.396      | PGAM1         | 0.751       |
| COLGALT2       | 276.7657438 | 0.253       | IAMC3    | 0.8789969 | 0.575       | ACO1       | -0.385      | ENO1          | 0.769       |
| COL27A1        | 1348.309875 | 0.331       | IAMA3    | 159.53939 | 1.364       | MDH2       | -0.317      | GOT1          | 1.039       |
| COL18A1        | 3090.377486 | 0.360       | FN1      | 3336999.1 | 1.073       | ACAA1      | -0.276      | SLC1A5        | 1.262       |
| COL1A2         | 2078111.224 | 0.387       | VTN      | 115.07548 | -0.435      | ACO2       | -0.226      | PGK1          | 1.505       |
| COL1A1         | 4702004.515 | 0.389       | CSPG4    | 4073.0969 | -2.099      | GLUD1      | -0.198      | HK2           | 1.711       |
| COL6A1         | 285002.3357 | 0.403       | CSPG5    | 1.6029233 | -0.551      | MDH1       | -0.146      | PDK1          | 2.089       |
| COL6A2         | 248978.9651 | 0.445       |          |           |             | SLC25A11   | -0.055      | SLC2A1 (GLUT) | 3.090       |
| COL5A1         | 330811.9863 | 0.532       |          |           |             |            |             |               |             |
| COL12A1        | 186271.7967 | 0.559       |          |           |             |            |             |               |             |
| COL6A3         | 198067.6591 | 0.647       |          |           |             |            |             |               |             |
| COL16A1        | 58461.76716 | 0.717       |          |           |             |            |             |               |             |
| COL3A1         | 1105710.498 | 0.803       |          |           |             |            |             |               |             |
| COL5A2         | 133287.175  | 0.948       |          |           |             |            |             |               |             |
| COL4A2         | 77603.23522 | 1.003       |          |           |             |            |             |               |             |
| COLC10         | 19.99988239 | 1.269       |          |           |             |            |             |               |             |
| COL4A1         | 71583.32838 | 1.315       |          |           |             |            |             |               |             |
| COL11A1        | 12369.87606 | 1.311       |          |           |             |            |             |               |             |
| COL8A2         | 2251.718871 | 1.389       |          |           |             |            |             |               |             |
| COL4A4         | 67.26282092 | 1.491       |          |           |             |            |             |               |             |
| COL7A1         | 1380.109014 | 1.497       |          |           |             |            |             |               |             |
| COL10A1        | 27.49548904 | 1.529       |          |           |             |            |             |               |             |
| COL1A2-AS1     | 12.24391896 | 1.610       |          |           |             |            |             |               |             |
| COL8A1         | 15809.3176  | 2.534       |          |           |             |            |             |               |             |
| COL15A1        | 5607.191027 | 2.922       |          |           |             |            |             |               |             |
| COL25A1        | 11.7449788  | 2.936       |          |           |             |            |             |               |             |

  

| D         |           |             | E         |             |             |
|-----------|-----------|-------------|-----------|-------------|-------------|
| CD Marker | baseMean  | log2(P8/P4) | CD Marker | baseMean    | log2(P8/P4) |
| CD24      | 78.000524 | -4.670      | CD27      | 8.594487665 | 0.031       |
| CD37      | 0.8846086 | -2.208      | CD81      | 35543.51401 | 0.056       |
| CD10      | 0.8738455 | -2.070      | CD27-AS1  | 375.023374  | 0.075       |
| CD160     | 5.0522087 | -1.802      | CD47      | 3483.289107 | 0.139       |
| CD22      | 0.6067068 | -1.558      | CD7       | 7.32564829  | 0.146       |
| CD93      | 5.9327982 | -1.201      | CD46      | 3672.215982 | 0.179       |
| CD4       | 9.9702786 | -1.031      | CD164     | 15683.86198 | 0.231       |
| CD36      | 2959.4987 | -0.848      | CD226     | 7.311187496 | 0.254       |
| CD248     | 82408.995 | -0.638      | CD2AP     | 1583.141664 | 0.379       |
| CD59      | 48905.449 | -0.625      | CD70      | 42.09056305 | 0.425       |
| CD300C    | 4.6817323 | -0.622      | CD302     | 830.211304  | 0.463       |
| CD101     | 8.1601247 | -0.572      | CD83      | 22.10610543 | 0.481       |
| CD81-AS1  | 14.948405 | -0.541      | CD58      | 275.9994606 | 0.507       |
| CD109     | 9943.3047 | -0.489      | CD74      | 25.99002444 | 0.616       |
| CD44      | 33621.445 | -0.456      | CD200R1   | 1.846806044 | 0.625       |
| CD9       | 1748.9165 | -0.432      | CD96      | 6.120009505 | 0.696       |
| CD40      | 28.185198 | -0.407      | CD33      | 1.101263924 | 0.930       |

  

| F        |             |          |             |             |             |
|----------|-------------|----------|-------------|-------------|-------------|
| GeneName | log2(P8/P4) | GeneName | log2(P8/P4) | GeneName    | log2(P8/P4) |
| CD320    | 2006.7097   | -0.403   | CD72        | 18.9656551  | 1.037       |
| CD79A    | 6.4168097   | -0.400   | CD274       | 88.93980647 | 1.094       |
| CD3EAP   | 744.93362   | -0.392   | CD55        | 2308.998904 | 1.123       |
| CD151    | 23550.369   | -0.248   | CD34        | 588.6512124 | 1.169       |
| CD68     | 5812.4687   | -0.228   | CD163L1     | 81.10102244 | 1.472       |
| CD63     | 41303.909   | -0.203   | CD38        | 129.0682795 | 1.538       |
| CD2BP2   | 2912.9015   | -0.195   | CD177       | 12.65214833 | 1.563       |
| CD19     | 1.1106145   | -0.160   | CD82        | 531.3420725 | 1.702       |
| CD276    | 8370.6867   | -0.125   | CD79B       | 1.162489724 | 1.759       |
| CD99     | 32663.45    | -0.043   | CD28        | 2.504790373 | 2.078       |
|          |             |          | CD14        | 112.194181  | 2.277       |
|          |             |          | CD200       | 67.63061132 | 3.155       |
|          |             |          | CD80        | 7.499752035 | 3.502       |
|          |             |          | CD163       | 18.05600314 | 4.356       |

Supplementary Figure S13. Heatmaps for DEGs of P4 vs. P8 only in Venn Diagram.

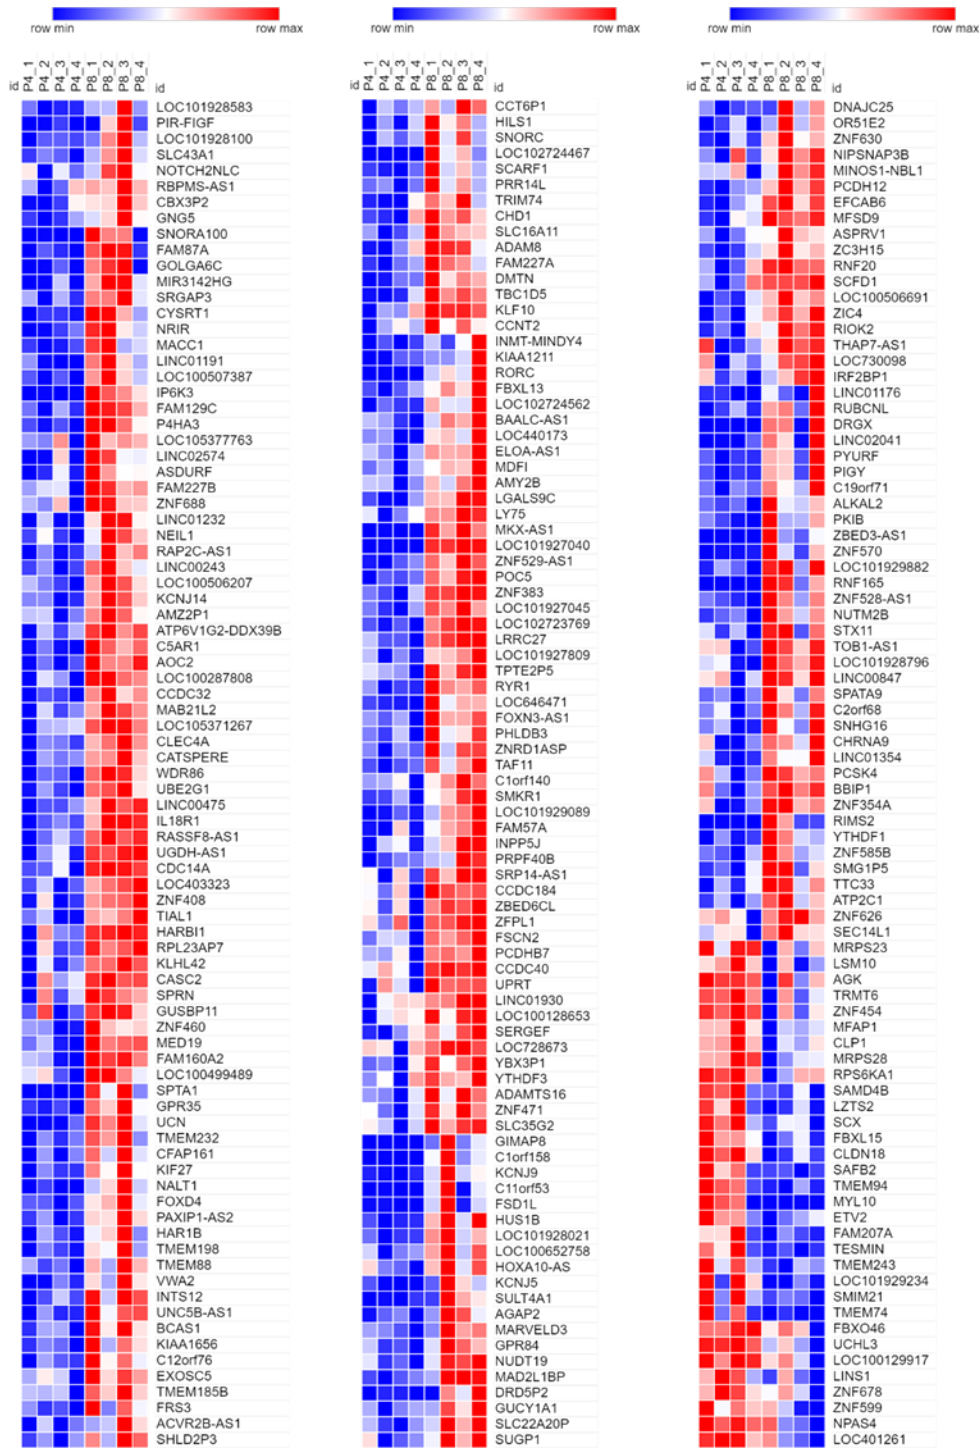

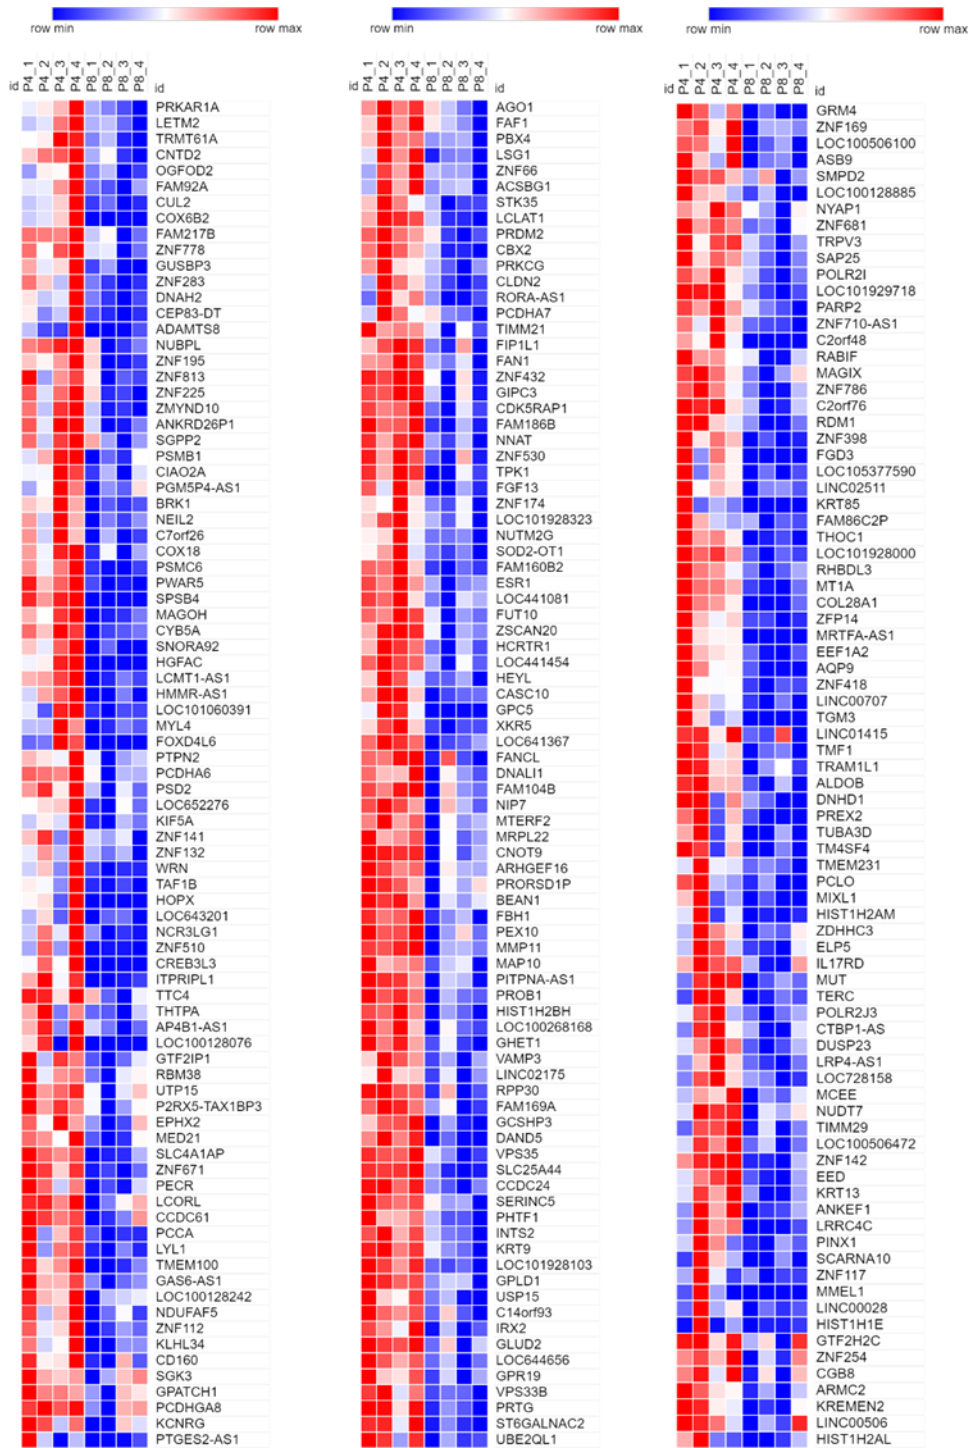

Supplementary Figure S14. Heatmaps for DEGs of P4 vs. P12 only in Venn Diagram.

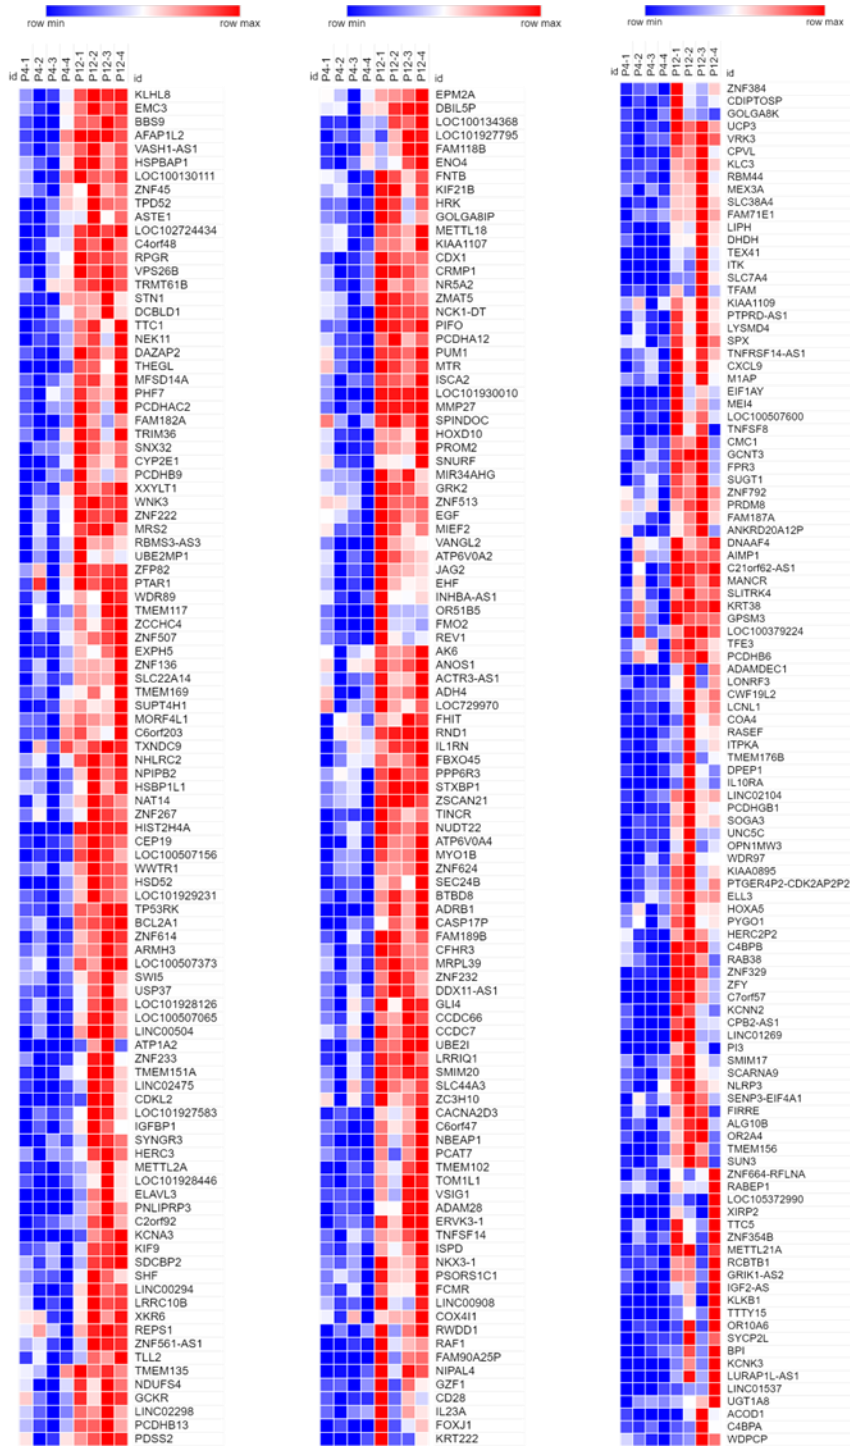

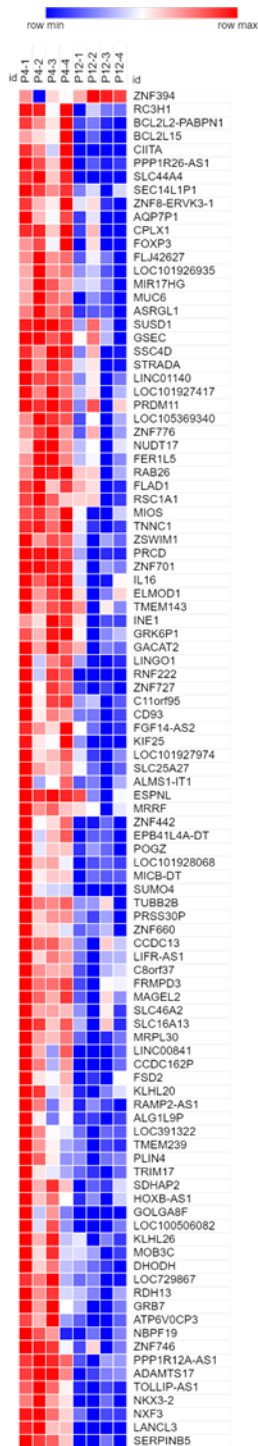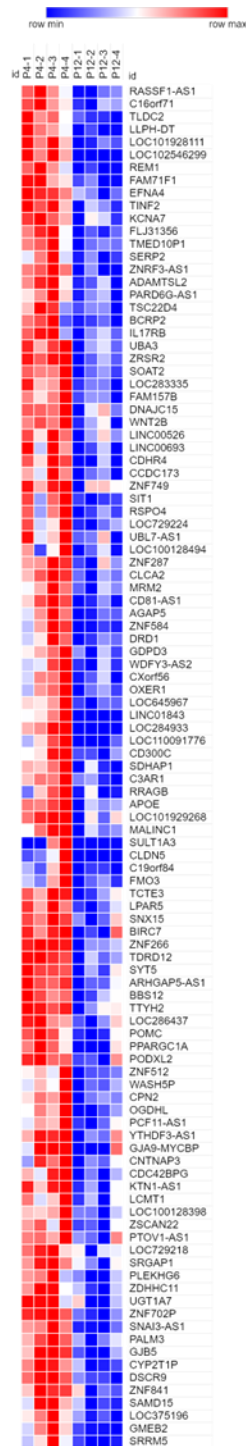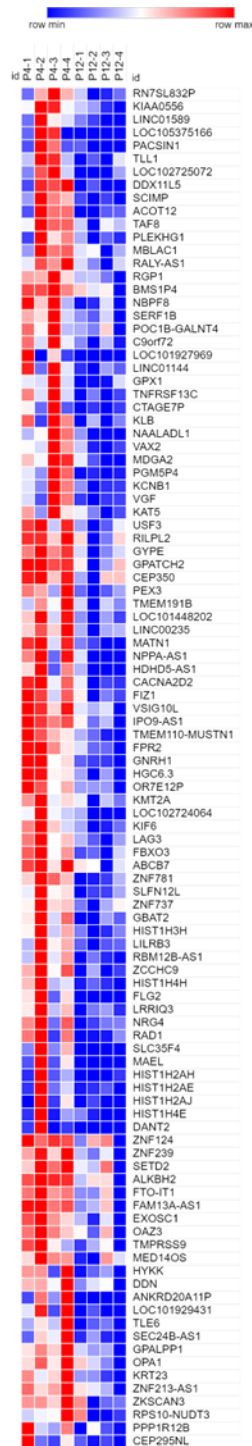

**Supplementary Figure S15. Schematic of proteomics analysis work flow for hASCs at P4, P8, and P12.**

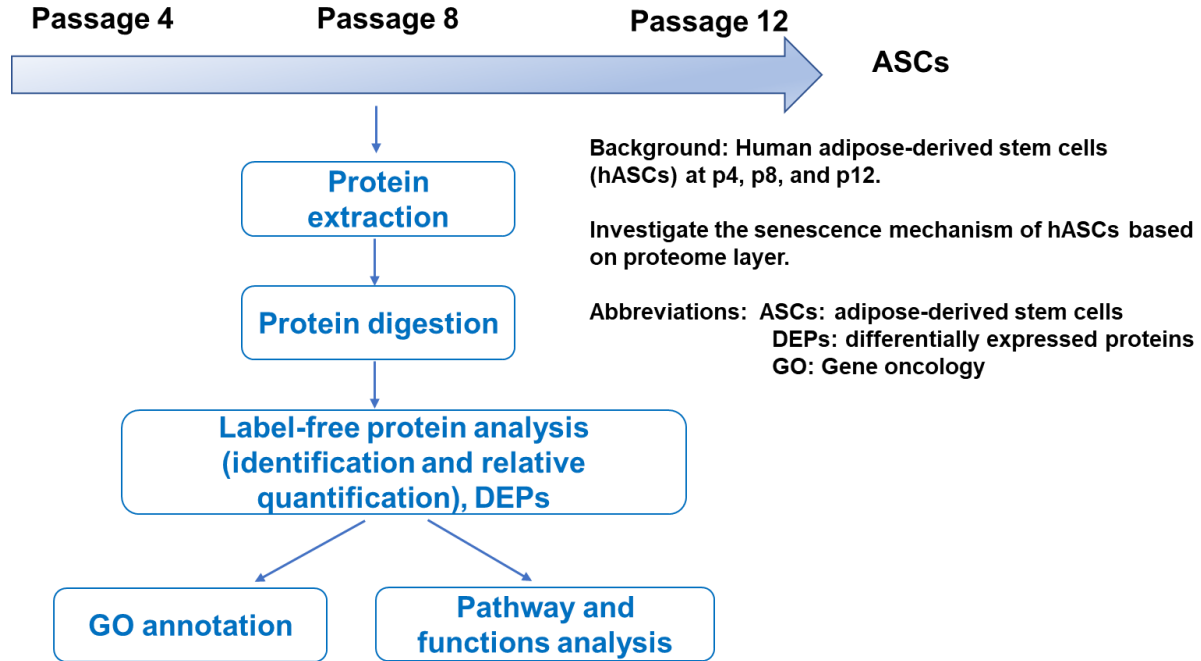

**Supplementary Figure S16. GO analysis of DEPs (P8/P4 hASCs with 90 DEPs)**

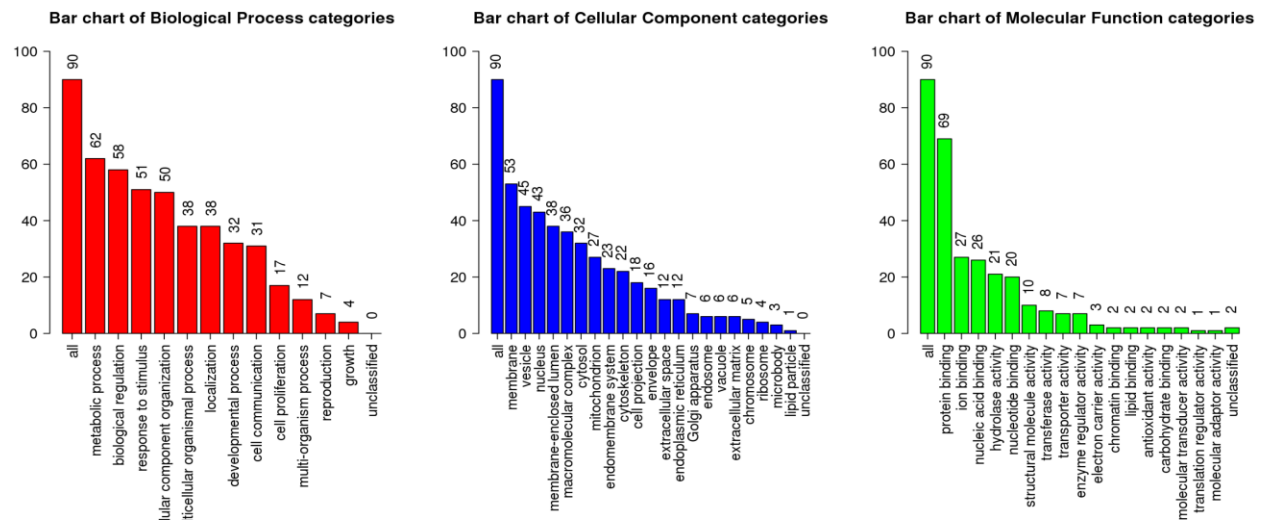

# Supplementary Figure S17. Pathway enrichment analysis of DEPs (P8/P4)

A.

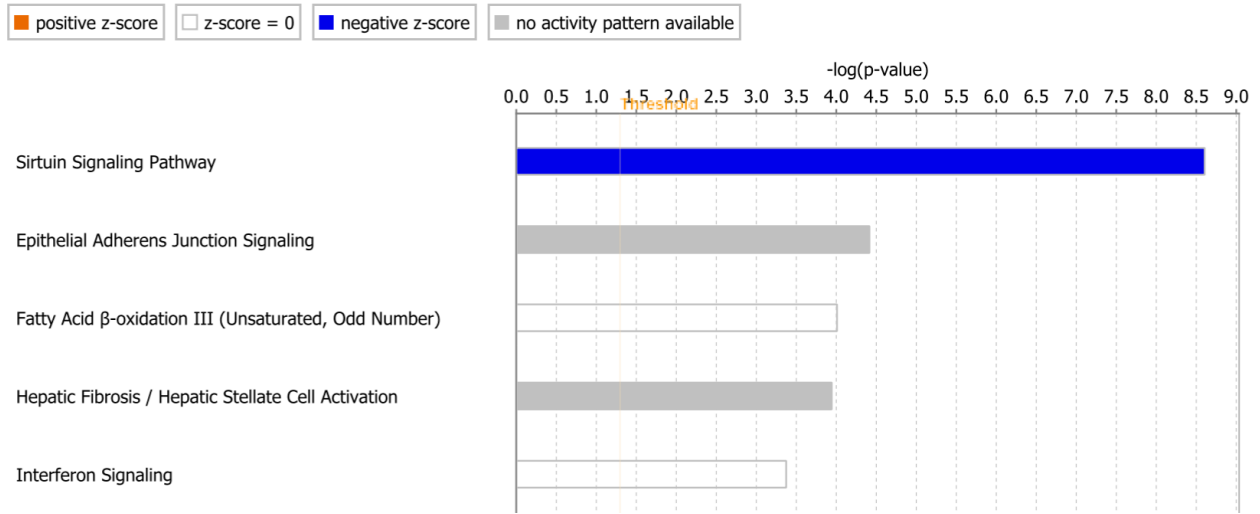

B.

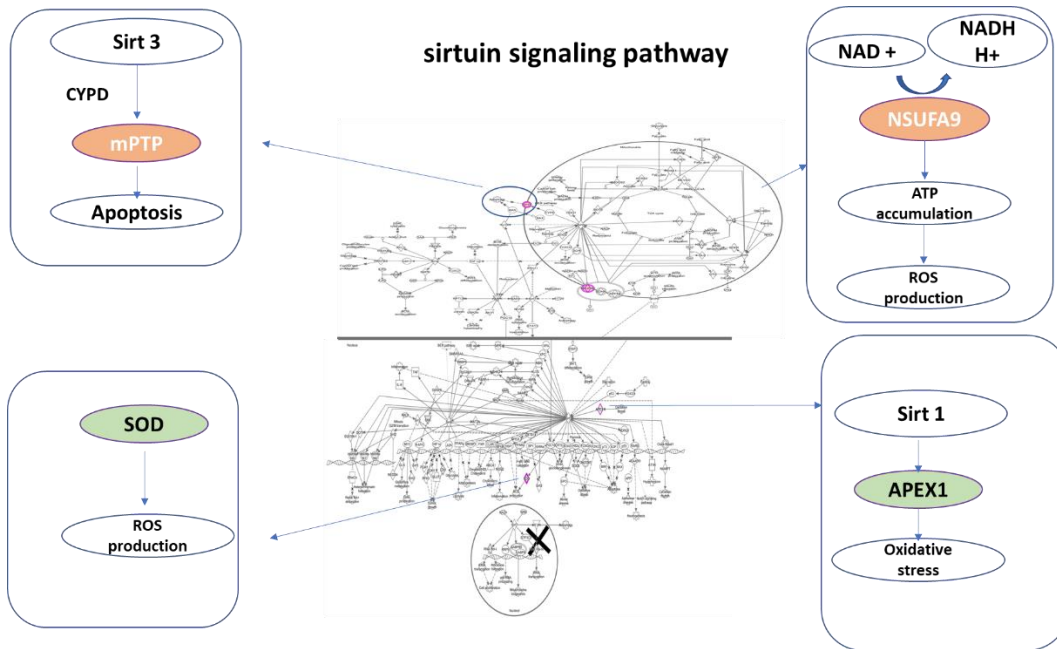



C.

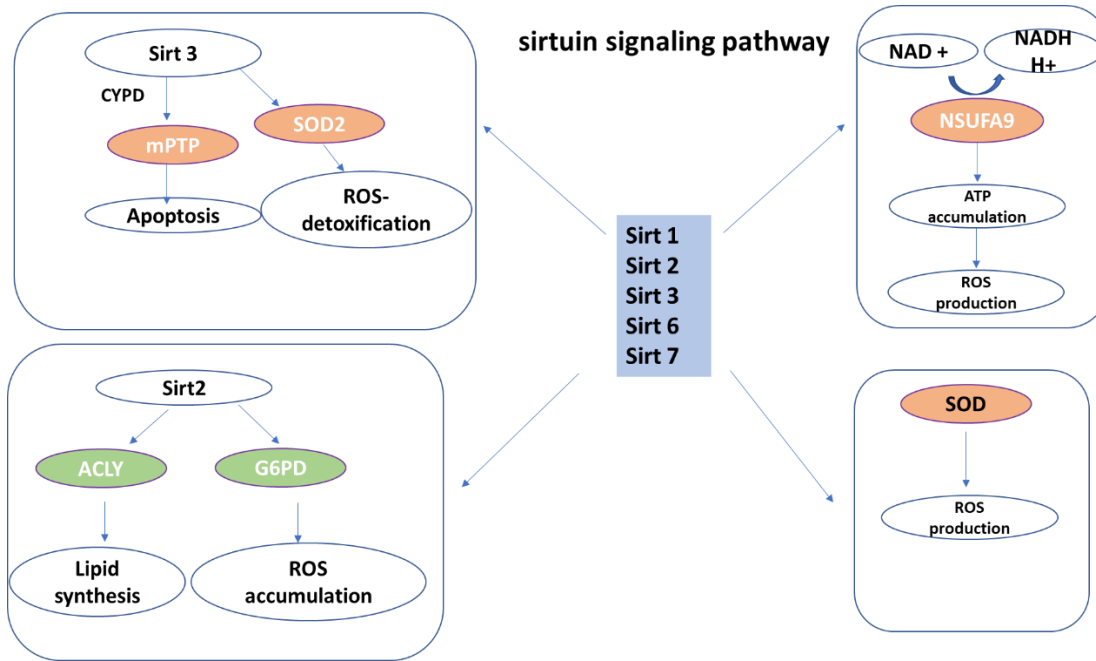

Supplementary Figure S18. GO analysis of DEPs overlapped between P8/P4 and P12/P4 hASCs.

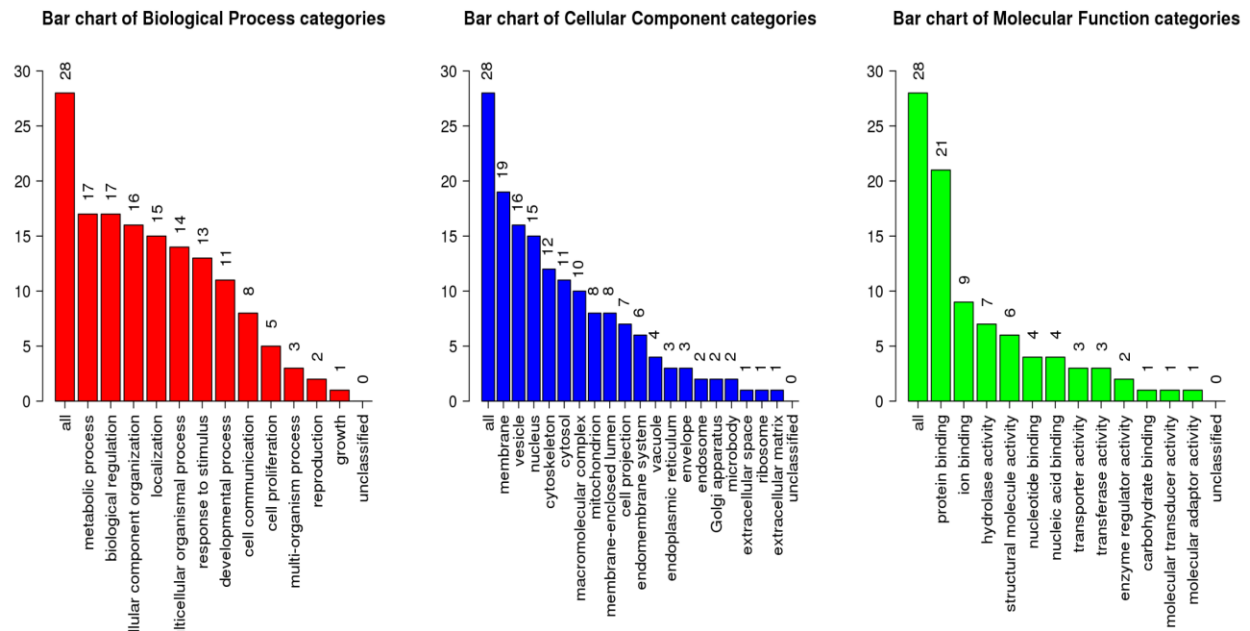

## **Supplementary materials for RNA-Seq data analysis**

### **Supplementary Spreadsheet 1. “P4\_vs\_P12\_Deseq2\_Plus” for RNA-Seq data analysis.**

DEGs for P4 and P12 comparison.

### **Supplementary Spreadsheet 2. “P4\_vs\_P8\_Deseq2\_Plus” for RNA-Seq data analysis.**

DEGs for P4 and P8 comparison.

## Supplementary Tables

**Supplementary Table S1. The donor information for the derived hASCs used in this study.**

| ID     | Years old | BMI  | race      |
|--------|-----------|------|-----------|
| Donor1 | 43        | 24.8 | caucasian |
| Donor2 | 40        | 21.1 | caucasian |
| Donor3 | 39        | <25  | caucasian |

**Supplementary Table S2. Primer sequences for target genes in RT-PCR analysis.**

| Gene            | Forward primer 5' to 3'    | Reverse primer 5' to 3'   |
|-----------------|----------------------------|---------------------------|
| <b>Oct-4</b>    | CAGCAGATCAGCCACATCGCC      | TGAGAAAGGAGACCCAGCAGCC    |
| <b>Nanog</b>    | CCTGTGATTTGTGGGCCTG        | GACAGTCTCCGTGTGAGGCAT     |
| <b>SOX2</b>     | GTATCAGGAGTTGTCAAGGCAGAG   | TCCTAGTCTTAAAGAGGCAGCAAAC |
| <b>P53</b>      | CTGGACGACAGGCAGACTTT       | GCACAAACACGAACCTCAAA      |
| <b>P15</b>      | GCTGTTTCATCAGCAGCCTAA      | TCCACAATGGAGCTAGAAGCA     |
| <b>(CDKN2B)</b> |                            |                           |
| <b>P21</b>      | GAGACTCTCAGGGTCGAAAACG     | GGATTAGGGCTTCCTCTTGGAG    |
| <b>NFKB</b>     | GACGAGCTCCGAGACAGTGAC      | GAGGCACCACTGGTCAGAGAC     |
| <b>mTOR</b>     | GCCTGGATGGCAACTACAGAA      | CCAGTTCAGCAAGGGGTCATA     |
| <b>PIK3CA</b>   | TTGGAGAACTTGGCCTTCATCT     | ACCCAATTAGGTCTGAGGACTGAA  |
| <b>AKT1</b>     | TATCGTGTGGCAGCACGTGTA      | GCCGTGAACTCCTCATCAAAAT    |
| <b>PTEN</b>     | GGCTGCTGTTGGCTTATCAGT      | AAACGCGGTAATTTTCAGAGC     |
| <b>SIRT1</b>    | TCGCAACTATACCCAGAACATAGACA | CTGTTGCAAAGGAACCATGACA    |
| <b>SIRT3</b>    | GCATCCCTGCCTCAAAGC         | CGTCAGCCCGAATGTCCTC       |
| <b>CD38</b>     | TTCCCGCAGTTTTTCTTTGAA      | GCACCTCTCAGCTGCCTACTG     |
| <b>CD73</b>     | GCCTGGGAGCTTACGATTTTG      | TAGTGCCCTGGTACTGGTTCG     |
| <b>NAMPT</b>    | CTCCATTCTGAGCACCAAACG      | ATGCCATTTGCTTTTTGTCTGG    |
| <b>PDK1</b>     | AAACAGGGGAGCTTTGTCTGG      | CTGCCATTACATCCCTCTA       |
| <b>PKM2</b>     | AAAAATGGATGCCAGAGGAC       | GAGTCGGCTTCAATGGAACAA     |
| <b>LDHA</b>     | CCTTGAGCCAGGTGGATGTTT      | CACTGGATCCCAGGATGTGAC     |
| <b>G6PD</b>     | CTACCCGAGCCCAGCTACATT      | TTCTGTTGGGCTGGAGTGAGT     |
| <b>(GL6PD)</b>  |                            |                           |

---

|                                |                             |                                 |
|--------------------------------|-----------------------------|---------------------------------|
| <b>6PGD</b>                    | CCATGCCCTGTTTTACCACTG       | AGGTGTGAGCCCCGAAGTAAT           |
| <b>(6PGLD)</b>                 |                             |                                 |
| <b>TALDO1</b>                  | CTGTCATCAACCTGGGAAGGA       | GGGCGAAGGAGAAGAGTAACG           |
| <b>TKTL1</b>                   | ACCTTGGGATTCTGTGTGCTG       | CCTAACAAGCTTTCGCTGCTG           |
| <b>TNF<math>\alpha</math></b>  | TGGCCAATGGCGTGGAGCTG        | GTAGGAGACGGCGATGCGGC            |
| <b>IL-6</b>                    | GAACTCCTTCTCCACAAGCG        | TTTTCTGCCAGTGCCTCTTT            |
| <b>IL-1<math>\beta</math></b>  | CCACAGACCTTCCAGGAGAATG      | GTGCAGTTCAGTGATCGTACAGG         |
| <b>IL-12<math>\beta</math></b> | CCAAGGGGTGACGTGCGGAG        | GGTGGGTCAGGTTTGATGATGTCCC       |
| <b>IL-10</b>                   | AAGCCTGACCACGCTTTCTA        | ATGAAGTGGTTGGGGAATGA            |
| <b>TGF- <math>\beta</math></b> | CCTACATTTGGAGCCTGGAC        | TGTCCTTAAATACAGCCCCC            |
| <b>CD163</b>                   | <i>CCAGTCCCAAACACTGTCCT</i> | <i>ATGCCAGTGAGCTTCCCGTTCAGC</i> |
| <b>ALP</b>                     | CAGTCTGCTGTGCCCTGC          | GTAGTTCTGCTCGTGGACGCC           |
| <b>BMP2</b>                    | TTCCCCGTGACCAGACTTTTGG      | GCCACTTCCACCACGAATCCAT          |
| <b>Osteo-<br/>calcin</b>       | GGCAGCGAGGTAGTGAAGAGAC      | GAAAGCCGATGTGGTCAGCCAA          |
| <b>Osteo-<br/>pontin</b>       | AGCGGAAAGCCAATGATGAGAGC     | ACTTTTGGGGTCTACAACCAGCAT        |
| <b>Runx2</b>                   | CCAACCCACGAATGCACTATC       | TAGTGAGTGGTGGCGGACATAC          |
| <b>CEBPA</b>                   | AGCCTTGTTTGTACTGTATG        | AAAATGGTGGTTTAGCAGAG            |
| <b>FABP4</b>                   | ACGAGAGGATGATAAACTGGTGG     | GCGAACTTCAGTCCAGGTCAAC          |
| <b>LPL</b>                     | CTGACCAAGGATAGTGGGATATAG    | GGTAACTGAGCGAGACTGTGTCT         |
| <b>PPARG</b>                   | AGCCTGCGAAAGCCTTTTGGTG      | GGCTTCACATTCAGCAAACCTGG         |
| <b>TFEB</b>                    | CCTGGTGGAGATTCCTGTCT        | CAGGACCAGTTGCCTCAGATG           |
| <b>BECN1</b>                   | ACTGTGTTGCTGCTCCATGCT       | AACGGCAGCTCCTTAGATTTGT          |
| <b>LAMP1</b>                   | TCACACGTAGGACGCATGAAG       | GAAGCGCTCCAGACACTCATC           |
| <b>MFN1</b>                    | AAATGCTCAAAGGGTGCTCCT       | GATGCATTATCTGGCGTTGCT           |
| <b>MFN2</b>                    | GATGCCTGTCACCAAGGTGTT       | TGCTTTTTGGGAGAGGTGTTG           |
| <b>FIS1</b>                    | CTGGTGCGGAGCAAGTACAAT       | CACGGCCAGGTAGAAGACGTA           |
| <b>DNM1L</b>                   | CGATGCACTTTTCTCCAGCAC       | TTCCGTTGTTTCTTGCTCTG            |
| <b>GAPDH</b>                   | TCACTGCCACCCAGAAGACTG       | GGATGACCTTGCCACAGC              |
| <b>TUB1a</b>                   | TGAGGAGGTTGGTGTGGATTC       | AAAAGCAGCACCTTTGTGACG           |
| <b>(TUBA1A)</b>                |                             |                                 |

---

**Supplementary Table S3. DEPs between P8 and P4 hASCs.** For a total of 90 DEPs, 44 were up regulated and 46 were down regulated.

| Protein name                                                  | Gene    | Molecular Weight | Fold Change (p8 vs p4) |
|---------------------------------------------------------------|---------|------------------|------------------------|
| Protein AHNAK2                                                | AHNAK2  | 617 kDa          | 8                      |
| Keratin, type I cytoskeletal 14                               | KRT14   | 52 kDa           | 6.6                    |
| Enoyl-CoA delta isomerase 2, mitochondrial                    | ECI2    | 44 kDa           | 5.2                    |
| Desmin                                                        | DES     | 54 kDa           | 5.2                    |
| Delta(3,5)-Delta(2,4)-dienoyl-CoA isomerase, mitochondrial    | ECH1    | 36 kDa           | 3.8                    |
| Fibrillin-1                                                   | FBN1    | 312 kDa          | 3.3                    |
| Keratin, type II cytoskeletal 8                               | KRT8    | 54 kDa           | 3.3                    |
| Collagen alpha-3(VI) chain                                    | COL6A3  | 344 kDa          | 3.3                    |
| Paraspeckle component 1                                       | PSPC1   | 59 kDa           | 3.2                    |
| Nuclear mitotic apparatus protein 1                           | NUMA1   | 238 kDa          | 3.1                    |
| NADH dehydrogenase [ubiquinone] 1 alpha subcomplex subunit 12 | NDUFA12 | 17 kDa           | 3                      |
| Probable 28S rRNA (cytosine(4447)-C(5))-methyltransferase     | NOP2    | 89 kDa           | 2.9                    |
| Acyl-coenzyme A thioesterase 9, mitochondrial                 | ACOT9   | 50 kDa           | 2.8                    |
| Lysosomal protective protein                                  | CTSA    | 54 kDa           | 2.7                    |
| NAD-dependent malic enzyme, mitochondrial                     | ME2     | 65 kDa           | 2.7                    |
| Ribosome production factor 2 homolog                          | RPF2    | 36 kDa           | 2.7                    |
| Early endosome antigen 1                                      | EEA1    | 162 kDa          | 2.7                    |
| Pyroline-5-carboxylate reductase 1, mitochondrial             | PYCR1   | 33 kDa           | 2.7                    |
| Ferrochelatase, mitochondrial                                 | FECH    | 48 kDa           | 2.6                    |
| Lon protease homolog, mitochondrial                           | LONP1   | 106 kDa          | 2.6                    |
| Serine/arginine repetitive matrix protein 2                   | SRRM2   | 300 kDa          | 2.5                    |
| Mitochondrial import inner membrane translocase subunit Tim13 | TIMM13  | 11 kDa           | 2.5                    |
| Monofunctional C1-tetrahydrofolate synthase, mitochondrial    | MTHFD1L | 106 kDa          | 2.5                    |
| Heat shock protein beta-7                                     | HSPB7   | 19 kDa           | 2.5                    |
| Ras-related protein R-Ras2                                    | RRAS2   | 23 kDa           | 2.4                    |
| Mitochondrial import receptor subunit TOM40 homolog           | TOMM40  | 38 kDa           | 2.4                    |
| Semaphorin-7A                                                 | SEMA7A  | 75 kDa           | 2.4                    |
| Transmembrane emp24 domain-containing protein 5               | TMED5   | 26 kDa           | 2.4                    |
| U1 small nuclear ribonucleoprotein C                          | SNRPC   | 17 kDa           | 2.4                    |
| NADH dehydrogenase [ubiquinone] flavoprotein 1, mitochondrial | NDUFV1  | 51 kDa           | 2.3                    |

|                                                                             |         |         |      |
|-----------------------------------------------------------------------------|---------|---------|------|
| Adenosine deaminase                                                         | ADA     | 41 kDa  | 2.3  |
| Heterogeneous nuclear ribonucleoprotein F                                   | HNRNPF  | 46 kDa  | 2.2  |
| NADH dehydrogenase [ubiquinone] 1 alpha subcomplex subunit 9, mitochondrial | NDUFA9  | 43 kDa  | 2.2  |
| 40S ribosomal protein S27-like                                              | RPS27L  | 9 kDa   | 2.2  |
| Collagen alpha-2(VI) chain                                                  | COL6A2  | 109 kDa | 2.2  |
| Flotillin-1                                                                 | FLOT1   | 47 kDa  | 2.2  |
| Voltage-dependent anion-selective channel protein 3                         | VDAC3   | 31 kDa  | 2.2  |
| Polycystin-2                                                                | PKD2    | 110 kDa | 2.1  |
| Epidermal growth factor receptor                                            | EGFR    | 134 kDa | 2.1  |
| Isochorismatase domain-containing protein 2                                 | ISOC2   | 22 kDa  | 2.1  |
| ADP/ATP translocase 2                                                       | SLC25A5 | 33 kDa  | 2.1  |
| Mitochondrial import inner membrane translocase subunit TIM50               | TIMM50  | 40 kDa  | 2    |
| Enoyl-CoA delta isomerase 1, mitochondrial                                  | ECI1    | 33 kDa  | 2    |
| NADH dehydrogenase [ubiquinone] 1 alpha subcomplex subunit 8                | NDUFA8  | 20 kDa  | 2    |
| Acid ceramidase                                                             | ASAH1   | 45 kDa  | -2   |
| Protein S100-A4                                                             | S100A4  | 12 kDa  | -2   |
| 60S ribosomal protein L26                                                   | RPL26   | 17 kDa  | -2   |
| Exportin-1                                                                  | XPO1    | 123 kDa | -2   |
| Glutamine--fructose-6-phosphate aminotransferase [isomerizing] 1            | GFPT1   | 79 kDa  | -2   |
| Isocitrate dehydrogenase [NADP] cytoplasmic                                 | IDH1    | 47 kDa  | -2   |
| Prostaglandin G/H synthase 1                                                | PTGS1   | 69 kDa  | -2   |
| Bcl-2-associated transcription factor 1                                     | BCLAF1  | 106 kDa | -2   |
| DNA-(apurinic or apyrimidinic site) lyase                                   | APEX1   | 36 kDa  | -2   |
| Peptidyl-tRNA hydrolase 2, mitochondrial                                    | PTRH2   | 19 kDa  | -2   |
| Interferon-induced protein with tetratricopeptide repeats 3                 | IFIT3   | 56 kDa  | -2   |
| ATP-dependent DNA helicase Q1                                               | RECQL   | 73 kDa  | -2   |
| 60 kDa SS-A/Ro ribonucleoprotein                                            | TROVE2  | 61 kDa  | -2   |
| Peptidase inhibitor 16                                                      | PI16    | 49 kDa  | -2.5 |
| Aldose reductase                                                            | AKR1B1  | 36 kDa  | -2.5 |
| High mobility group protein B1                                              | HMGB1   | 25 kDa  | -2.5 |
| Microtubule-associated protein RP/EB family member 1                        | MAPRE1  | 30 kDa  | -2.5 |

|                                                             |         |         |       |
|-------------------------------------------------------------|---------|---------|-------|
| ATP-dependent 6-phosphofructokinase, platelet type          | PFKP    | 86 kDa  | -2.5  |
| EH domain-containing protein 1                              | EHD1    | 61 kDa  | -2.5  |
| Malignant T-cell-amplified sequence 1                       | MCTS1   | 21 kDa  | -2.5  |
| Ubiquitin carboxyl-terminal hydrolase 5                     | USP5    | 96 kDa  | -2.5  |
| Cysteine and glycine-rich protein 2                         | CSRP2   | 21 kDa  | -2.5  |
| Drebrin-like protein                                        | DBNL    | 48 kDa  | -2.5  |
| Actin-related protein 2/3 complex subunit 3                 | ARPC3   | 21 kDa  | -2.5  |
| ADP/ATP translocase 1                                       | SLC25A4 | 33 kDa  | -2.5  |
| Bifunctional purine biosynthesis protein PURH               | ATIC    | 65 kDa  | -2.5  |
| Hepatoma-derived growth factor                              | HDGF    | 27 kDa  | -2.5  |
| Sorbin and SH3 domain-containing protein 2                  | SORBS2  | 124 kDa | -2.5  |
| Interferon-induced GTP-binding protein Mx2                  | MX2     | 82 kDa  | -2.5  |
| Puromycin-sensitive aminopeptidase                          | NPEPPS  | 103 kDa | -2.5  |
| Protein YIF1B                                               | YIF1B   | 34 kDa  | -2.5  |
| Interferon-induced protein with tetratricopeptide repeats 1 | IFIT1   | 55 kDa  | -2.5  |
| A-kinase anchor protein 12                                  | AKAP12  | 191 kDa | -2.5  |
| 1,4-alpha-glucan-branching enzyme                           | GBE1    | 80 kDa  | -2.5  |
| NAD(P)H dehydrogenase [quinone] 1                           | NQO1    | 31 kDa  | -2.5  |
| Calponin-1                                                  | CNN1    | 33 kDa  | -3.3  |
| Myosin-10                                                   | MYH10   | 229 kDa | -3.3  |
| Phosphoglucomutase-1                                        | PGM1    | 61 kDa  | -3.3  |
| Purine nucleoside phosphorylase                             | PNP     | 32 kDa  | -3.3  |
| Integrin alpha-1                                            | ITGA1   | 131 kDa | -3.3  |
| Kinesin-1 heavy chain                                       | KIF5B   | 110 kDa | -3.3  |
| Dihydropyrimidinase-related protein 3                       | DPYSL3  | 62 kDa  | -3.3  |
| Myosin light chain 1/3, skeletal muscle isoform             | MYL1    | 21 kDa  | -5    |
| Interferon-induced GTP-binding protein Mx1                  | MX1     | 76 kDa  | -5    |
| Protein-glutamine gamma-glutamyltransferase 2               | TGM2    | 77 kDa  | -10   |
| Myosin-7                                                    | MYH7    | 223 kDa | -14.3 |

**Supplementary Table S4. Upstream analysis of DEPs (P8/P4 hASCs)**

| Upstream Regulator     | Molecule Type                   | Predicted Activation State | Activation z-score | p-value of overlap | Target molecules in dataset                                                                                              |
|------------------------|---------------------------------|----------------------------|--------------------|--------------------|--------------------------------------------------------------------------------------------------------------------------|
| MAPK1                  | kinase                          | Activated                  | 2.236              | 0.0157             | EHD1,IFIT1,IFIT3,MX2,MYH7                                                                                                |
| SB203580               | chemical - kinase inhibitor     | Activated                  | 2.213              | 0.0413             | IFIT1,IFIT3,MX1,NQO1,TGM2                                                                                                |
| fluticasone propionate | chemical drug                   | Activated                  | 2                  | 0.00578            | IFIT1,MX1,PTGS1,TGM2                                                                                                     |
| mir-122                | microRNA                        | Activated                  | 2                  | 0.000531           | KIF5B,MAPRE1,NPEPPS,TGM2                                                                                                 |
| BTK                    | kinase                          | Activated                  | 2                  | 0.00012            | CTSA,IFIT1,IFIT3,MX1,MX2                                                                                                 |
| oblimersen             | biologic drug                   | Inhibited                  | -2                 | 7.91E-05           | IFIT1,IFIT3,MX1,MX2                                                                                                      |
| TLR7                   | transmembrane receptor          | Inhibited                  | -2                 | 0.00366            | IFIT1,IFIT3,MX1,MX2                                                                                                      |
| CREB1                  | transcription regulator         | Inhibited                  | -2                 | 0.00916            | ARPC3,CNN1,CSR2,MYH10,NDUFV1,RRAS2,SEMA7A                                                                                |
| lipopolysaccharide     | chemical drug                   | Inhibited                  | -2.033             | 0.00129            | ADA,APEX1,EHD1,FBN1,HDGF,HMGB1,IDH1,IFIT1,IFIT3,MC                                                                       |
| Interferon alpha       | group                           | Inhibited                  | -2.082             | 0.0378             | EGFR,IFIT1,IFIT3,MX1,MX2                                                                                                 |
| IFNA2                  | cytokine                        | Inhibited                  | -2.18              | 0.00314            | IFIT1,IFIT3,MX1,MX2,TGM2                                                                                                 |
| IL1B                   | cytokine                        | Inhibited                  | -2.551             | 0.00174            | AKR1B1,HMGB1,IFIT1,IFIT3,ITGA1,MX1,NQO1,PFKP,PTGS1,SLC25A4,TGM2                                                          |
| tretinoin              | chemical - endogenous mammalian | Inhibited                  | -2.636             | 1.73E-06           | ADA,AKAP12,APEX1,COL6A3,DPYSL3,ECI2,EGFR,EHD1,HDGF,HNRNPF,IFIT1,IFIT3,ITGA1,KRT14,MYH7,NDUFV1,PNP,PTGS1,RPF2,SEMA7A,TGM2 |



**Supplementary Table S5. DEPs between P12 and P4 hASCs.** For a total of 318 DEPs, 86 were up regulated, and 232 were down regulated.

| Protein name                                                      | Gene name | Molecular Weight | Fold Change by p12 vs p4 |
|-------------------------------------------------------------------|-----------|------------------|--------------------------|
| Dipeptidyl peptidase 4                                            | DPP4      | 88 kDa           | 23                       |
| Integrin alpha-2                                                  | ITGA2     | 129 kDa          | 23                       |
| Calponin-1                                                        | CNN1      | 33 kDa           | 22                       |
| Keratin, type I cytoskeletal 14                                   | KRT14     | 52 kDa           | 18                       |
| Lactadherin                                                       | MFGE8     | 43 kDa           | 11                       |
| Voltage-dependent calcium channel subunit alpha-2/delta-1         | CACNA2D1  | 125 kDa          | 9                        |
| Delta-sarcoglycan                                                 | SGCD      | 32 kDa           | 8.3                      |
| Synaptopodin-2                                                    | SYNPO2    | 118 kDa          | 6.6                      |
| Raftlin                                                           | RFTN1     | 63 kDa           | 6.3                      |
| Nexilin                                                           | NEXN      | 81 kDa           | 5.5                      |
| Flotillin-1                                                       | FLOT1     | 47 kDa           | 5.5                      |
| Plasma membrane calcium-transporting ATPase 4                     | ATP2B4    | 138 kDa          | 5.4                      |
| Ras-related protein R-Ras2                                        | RRAS2     | 23 kDa           | 5.3                      |
| V-type proton ATPase 116 kDa subunit a isoform 1                  | ATP6V0A1  | 196 kDa          | 5.2                      |
| Sorbin and SH3 domain-containing protein 2                        | SORBS2    | 124 kDa          | 5.1                      |
| ADP-ribosyl cyclase/cyclic ADP-ribose hydrolase 2                 | BST1      | 36 kDa           | 4.8                      |
| Melanotransferrin                                                 | MELTF     | 80 kDa           | 4.7                      |
| Myosin regulatory light polypeptide 9                             | MYL9      | 20 kDa           | 4.5                      |
| Cysteine and glycine-rich protein 2                               | CSRP2     | 21 kDa           | 4.4                      |
| Myosin-10                                                         | MYH10     | 229 kDa          | 4.4                      |
| Myosin phosphatase Rho-interacting protein                        | MPRIP     | 117 kDa          | 4.4                      |
| Intercellular adhesion molecule 1                                 | ICAM1     | 58 kDa           | 4.1                      |
| Actin, aortic smooth muscle                                       | ACTA2     | 42 kDa           | 4.1                      |
| Superoxide dismutase [Mn], mitochondrial                          | SOD2      | 25 kDa           | 4                        |
| Solute carrier family 2, facilitated glucose transporter member 1 | SLC2A1    | 54 kDa           | 4                        |
| Lysosomal protective protein                                      | CTSA      | 54 kDa           | 3.8                      |
| Ankyrin                                                           | RAI14     | 110 kDa          | 3.8                      |
| Large neutral amino acids transporter small subunit 1             | SLC7A5    | 55 kDa           | 3.8                      |
| Aldehyde dehydrogenase X, mitochondrial                           | ALDH1B1   | 57 kDa           | 3.7                      |
| Matrix-remodeling-associated protein 7                            | MXRA7     | 21 kDa           | 3.7                      |

|                                                               |         |         |     |
|---------------------------------------------------------------|---------|---------|-----|
| Cell migration-inducing and hyaluronan-binding protein        | CEMIP   | 153 kDa | 3.7 |
| Plasma membrane calcium-transporting ATPase 1                 | ATP2B1  | 135 kDa | 3.4 |
| Endoplasmic reticulum junction formation protein lunapark     | LNPK    | 48 kDa  | 3.2 |
| HLA class I histocompatibility antigen, B-44 alpha chain      | HLA-B   | 40 kDa  | 3.2 |
| BAG family molecular chaperone regulator 2                    | BAG2    | 24 kDa  | 3.1 |
| ADP/ATP translocase 1                                         | SLC25A4 | 33 kDa  | 3.1 |
| Glutaredoxin-1                                                | GLRX    | 12 kDa  | 3   |
| Integrin beta-1                                               | ITGB1   | 88 kDa  | 2.9 |
| Selenoprotein M                                               | SELENOM | 16 kDa  | 2.9 |
| Stromal interaction molecule 1                                | STIM1   | 77 kDa  | 2.9 |
| Gamma-glutamyl hydrolase                                      | GGH     | 36 kDa  | 2.9 |
| Acid ceramidase                                               | ASAH1   | 45 kDa  | 2.9 |
| Mitochondrial import inner membrane translocase subunit Tim13 | TIMM13  | 11 kDa  | 2.8 |
| Peroxisomal acyl-coenzyme A oxidase 1                         | ACOX1   | 74 kDa  | 2.8 |
| Guanine nucleotide-binding protein subunit beta-4             | GNB4    | 38 kDa  | 2.7 |
| Delta(3,5)-Delta(2,4)-dienoyl-CoA isomerase, mitochondrial    | ECH1    | 36 kDa  | 2.7 |
| Utrophin                                                      | UTRN    | 394 kDa | 2.7 |
| Retinol dehydrogenase 10                                      | RDH10   | 38 kDa  | 2.7 |
| Microtubule-associated protein 1A                             | MAP1A   | 305 kDa | 2.6 |
| DnaJ homolog subfamily C member 5                             | DNAJC5  | 22 kDa  | 2.6 |
| Polycystin-2                                                  | PKD2    | 110 kDa | 2.6 |
| Multidrug resistance-associated protein 4                     | ABCC4   | 150 kDa | 2.6 |
| Perilipin-2                                                   | PLIN2   | 48 kDa  | 2.6 |
| GRAM domain-containing protein 2B                             | GRAMD2B | 48 kDa  | 2.6 |
| Cysteine and glycine-rich protein 1                           | CSRP1   | 21 kDa  | 2.5 |
| N-acetylglucosamine-6-sulfatase                               | GNS     | 62 kDa  | 2.5 |
| Copine-3                                                      | CPNE3   | 60 kDa  | 2.5 |
| Polypeptide N-acetylgalactosaminyltransferase 2               | GALNT2  | 65 kDa  | 2.5 |
| Annexin A7                                                    | ANXA7   | 53 kDa  | 2.5 |
| Enoyl-CoA delta isomerase 2, mitochondrial                    | ECI2    | 44 kDa  | 2.5 |

|                                                     |          |         |     |
|-----------------------------------------------------|----------|---------|-----|
| Heterogeneous nuclear ribonucleoprotein H3          | HNRNPH3  | 37 kDa  | 0.5 |
| Septin-7                                            | SEPT7    | 51 kDa  | 0.5 |
| Heterogeneous nuclear ribonucleoprotein A1          | HNRNPA1  | 39 kDa  | 0.5 |
| Procollagen galactosyltransferase 1                 | COLGALT1 | 72 kDa  | 0.5 |
| Eukaryotic translation initiation factor 4 gamma 1  | EIF4G1   | 175 kDa | 0.5 |
| Peptidyl-prolyl cis-trans isomerase FKBP3           | FKBP3    | 25 kDa  | 0.5 |
| Collagen alpha-1(XII) chain                         | COL12A1  | 333 kDa | 0.5 |
| Peptidyl-prolyl cis-trans isomerase FKBP7           | FKBP7    | 26 kDa  | 0.5 |
| ADP-ribosylation factor-like protein 1              | ARL1     | 20 kDa  | 0.5 |
| 40S ribosomal protein S28                           | RPS28    | 8 kDa   | 0.5 |
| Elongation factor 2                                 | EEF2     | 95 kDa  | 0.5 |
| Nuclear transport factor 2                          | NUTF2    | 14 kDa  | 0.5 |
| Heterogeneous nuclear ribonucleoprotein U           | HNRNPU   | 91 kDa  | 0.5 |
| E3 ubiquitin/ISG15 ligase TRIM25                    | TRIM25   | 71 kDa  | 0.5 |
| Proteasome subunit beta type-1                      | PSMB1    | 26 kDa  | 0.5 |
| Coiled-coil domain-containing protein 47            | CCDC47   | 56 kDa  | 0.5 |
| Vigilin                                             | HDLBP    | 141 kDa | 0.5 |
| Far upstream element-binding protein 1              | FUBP1    | 68 kDa  | 0.5 |
| Splicing factor 3A subunit 3                        | SF3A3    | 59 kDa  | 0.5 |
| 26S proteasome non-ATPase regulatory subunit 4      | PSMD4    | 41 kDa  | 0.5 |
| ATP-dependent RNA helicase A                        | DHX9     | 141 kDa | 0.5 |
| RNA-binding protein Raly                            | RALY     | 32 kDa  | 0.5 |
| Serine hydroxymethyltransferase, mitochondrial      | SHMT2    | 56 kDa  | 0.5 |
| Guanine nucleotide-binding protein subunit alpha-13 | GNA13    | 44 kDa  | 0.5 |
| Cytoplasmic dynein 1 heavy chain 1                  | DYNC1H1  | 532 kDa | 0.5 |
| 60S ribosomal protein L36                           | RPL36    | 12 kDa  | 0.5 |
| Elongation factor 1-alpha 1                         | EEF1A1   | 50 kDa  | 0.5 |
| RNA-binding protein 3                               | RBM3     | 17 kDa  | 0.5 |
| 26S proteasome regulatory subunit 7                 | PSMC2    | 49 kDa  | 0.5 |

|                                                                             |            |         |     |
|-----------------------------------------------------------------------------|------------|---------|-----|
| Leucyl-cystinyl aminopeptidase                                              | LNPEP      | 117 kDa | 2.4 |
| Reticulon-3                                                                 | RTN3       | 113 kDa | 2.4 |
| Neudesin                                                                    | NENF       | 19 kDa  | 2.4 |
| Multidrug resistance-associated protein 1                                   | ABCC1      | 172 kDa | 2.4 |
| Solute carrier family 12 member 4                                           | SLC12A4    | 121 kDa | 2.3 |
| Dynamin-like 120 kDa protein, mitochondrial                                 | OPA1       | 112 kDa | 2.3 |
| Tropomyosin alpha-3 chain                                                   | TPM3       | 33 kDa  | 2.3 |
| PDZ and LIM domain protein 5                                                | PDLIM5     | 64 kDa  | 2.3 |
| Plasminogen activator inhibitor 1                                           | SERPINE1   | 45 kDa  | 2.2 |
| Lysosome membrane protein 2                                                 | SCARB2     | 54 kDa  | 2.2 |
| MICOS complex subunit MIC19                                                 | CHCHD3     | 26 kDa  | 2.2 |
| Connective tissue growth factor                                             | CTGF       | 38 kDa  | 2.2 |
| V-type proton ATPase subunit d 1                                            | ATP6V0D1   | 40 kDa  | 2.2 |
| Procollagen-lysine,2-oxoglutarate 5-dioxygenase 2                           | PLOD2      | 85 kDa  | 2.2 |
| Lysosomal acid glucosylceramidase                                           | GBA        | 60 kDa  | 2.2 |
| Protein O-mannosyl-transferase TMTC3                                        | TMTC3      | 104 kDa | 2.1 |
| ATP synthase subunit gamma, mitochondrial                                   | ATP5F1C    | 33 kDa  | 2.1 |
| Guanine nucleotide-binding protein G(q) subunit alpha                       | GNAQ       | 42 kDa  | 2.1 |
| Thy-1 membrane glycoprotein                                                 | THY1       | 18 kDa  | 2.1 |
| Calpain-1 catalytic subunit                                                 | CAPN1      | 82 kDa  | 2.1 |
| Glia-derived nexin                                                          | SERPINE2   | 44 kDa  | 2.1 |
| Lysyl oxidase homolog 2                                                     | LOXL2      | 87 kDa  | 2.1 |
| Inorganic pyrophosphatase                                                   | PPA1       | 33 kDa  | 2.1 |
| CD166 antigen                                                               | ALCAM      | 65 kDa  | 2.1 |
| Tropomyosin beta chain                                                      | TPM2       | 33 kDa  | 2   |
| NADH dehydrogenase [ubiquinone] 1 alpha subcomplex subunit 9, mitochondrial | NDUFA9     | 43 kDa  | 2   |
| Moesin                                                                      | MSN        | 68 kDa  | 0.5 |
| Nascent polypeptide-associated complex subunit alpha, muscle-specific form  | NACA       | 205 kDa | 0.5 |
| Poly(U)-binding-splicing factor PUF60                                       | PUF60      | 60 kDa  | 0.5 |
| Interleukin enhancer-binding factor 3                                       | ILF3       | 95 kDa  | 0.5 |
| Nucleolar protein 58                                                        | NOP58      | 60 kDa  | 0.5 |
| Oligoribonuclease, mitochondrial                                            | REXO2      | 27 kDa  | 0.5 |
| Caprin-1                                                                    | CAPRIN1    | 78 kDa  | 0.5 |
| Ribosomal L1 domain-containing protein 1                                    | RSL1D1     | 55 kDa  | 0.5 |
| RNA-binding protein FUS                                                     | FUS        | 53 kDa  | 0.5 |
| Insulin-like growth factor 2 mRNA-binding protein 2                         | IGF2BP2    | 66 kDa  | 0.5 |
| Keratin, type II cytoskeletal 8                                             | KRT8       | 54 kDa  | 0.5 |
| Neutral amino acid transporter B(0)                                         | SLC1A5     | 57 kDa  | 0.5 |
| Alpha-enolase                                                               | ENO1       | 47 kDa  | 0.5 |
| Collagen alpha-1(I) chain                                                   | COL1A1     | 139 kDa | 0.5 |
| Sorting nexin-9                                                             | SNX9       | 67 kDa  | 0.5 |
| 26S proteasome regulatory subunit 6A                                        | PSMC3      | 49 kDa  | 0.5 |
| Plectin                                                                     | PLEC       | 532 kDa | 0.4 |
| Spliceosome RNA helicase DDX39B                                             | DDX39B     | 49 kDa  | 0.4 |
| 40S ribosomal protein S10                                                   | RPS10      | 19 kDa  | 0.4 |
| Glucose-6-phosphate isomerase                                               | GPI        | 63 kDa  | 0.4 |
| Rab GDP dissociation inhibitor beta                                         | GDI2       | 51 kDa  | 0.4 |
| Dynein light chain 1, cytoplasmic                                           | DYNLL1     | 10 kDa  | 0.4 |
| Proteasome subunit alpha type-7                                             | PSMA7      | 28 kDa  | 0.4 |
| Glutamine-fructose-6-phosphate aminotransferase [isomerizing] 1             | GFPT1      | 79 kDa  | 0.4 |
| Non-POU domain-containing octamer-binding protein                           | NONO       | 54 kDa  | 0.4 |
| Poly(rC)-binding protein 2                                                  | PCBP2      | 39 kDa  | 0.4 |
| Creatine kinase B-type                                                      | CKB        | 43 kDa  | 0.4 |
| Alpha-centractin                                                            | ACTR1A     | 43 kDa  | 0.4 |
| Emerin                                                                      | EMD        | 29 kDa  | 0.4 |
| 26S proteasome non-ATPase regulatory subunit 2                              | PSMD2      | 100 kDa | 0.4 |
| Heterogeneous nuclear ribonucleoprotein R                                   | HNRNP R    | 71 kDa  | 0.4 |
| Eukaryotic translation initiation factor 5A-1                               | EIF5A      | 17 kDa  | 0.4 |
| Probable ATP-dependent RNA helicase DDX17                                   | DDX17      | 80 kDa  | 0.4 |
| Actin-related protein 2/3 complex subunit 3                                 | ARPC3      | 21 kDa  | 0.4 |
| Histone H2B type 1-B                                                        | HIST1H2B B | 14 kDa  | 0.4 |

|                                                                                   |          |          |     |
|-----------------------------------------------------------------------------------|----------|----------|-----|
| Serine/arginine-rich splicing factor 9                                            | SRSF9    | 26 kDa   | 0.4 |
| Histone H4                                                                        | HIST1H4A | 11 kDa   | 0.4 |
| Myristoylated alanine-rich C-kinase substrate                                     | MARCKS   | 32 kDa   | 0.4 |
| Proteasome subunit beta type-4                                                    | PSMB4    | 29 kDa   | 0.4 |
| Heterogeneous nuclear ribonucleoprotein L                                         | HNRNPL   | 64 kDa   | 0.4 |
| Drebrin-like protein                                                              | DBNL     | 48 kDa   | 0.4 |
| Serine/threonine-protein phosphatase PP1-alpha catalytic subunit                  | PPP1CA   | 38 kDa   | 0.4 |
| Transforming growth factor beta-1-induced transcript 1 protein                    | TGFB11   | 50 kDa   | 0.4 |
| Splicing factor U2AF 65 kDa subunit                                               | U2AF2    | 54 kDa   | 0.4 |
| Microtubule-associated protein RP/EB family member 1                              | MAPRE1   | 30 kDa   | 0.4 |
| U1 small nuclear ribonucleoprotein 70 kDa                                         | SNRNP70  | 52 kDa   | 0.4 |
| Integrin-linked protein kinase                                                    | ILK      | 51 kDa   | 0.4 |
| Signal recognition particle subunit SRP72                                         | SRP72    | 75 kDa   | 0.4 |
| U1 small nuclear ribonucleoprotein A                                              | SNRPA    | 31 kDa   | 0.4 |
| 26S proteasome non-ATPase regulatory subunit 14                                   | PSMD14   | 35 kDa   | 0.4 |
| Nesprin-1                                                                         | SYNE1    | 1011 kDa | 0.4 |
|                                                                                   | FAM114A  |          |     |
| Protein NOXP20                                                                    | 1        | 61 kDa   | 0.4 |
| Eukaryotic translation initiation factor 3 subunit F                              | EIF3F    | 38 kDa   | 0.4 |
| Alpha-parvin                                                                      | PARVA    | 42 kDa   | 0.4 |
| TAR DNA-binding protein 43                                                        | TARDBP   | 45 kDa   | 0.4 |
| Nucleoside diphosphate kinase B                                                   | NME2     | 17 kDa   | 0.4 |
| Phenylalanine--tRNA ligase alpha subunit                                          | FARSA    | 58 kDa   | 0.4 |
| Eukaryotic translation initiation factor 3 subunit D                              | EIF3D    | 64 kDa   | 0.4 |
| Far upstream element-binding protein 3                                            | FUBP3    | 62 kDa   | 0.4 |
| Sorting nexin-3                                                                   | SNX3     | 19 kDa   | 0.4 |
| X-ray repair cross-complementing protein 6                                        | XRCC6    | 70 kDa   | 0.4 |
| Protein transport protein Sec24D                                                  | SEC24D   | 113 kDa  | 0.4 |
| THO complex subunit 4                                                             | ALYREF   | 27 kDa   | 0.4 |
| Pre-mRNA-processing-splicing factor 8                                             | PRPF8    | 274 kDa  | 0.4 |
| Nuclease-sensitive element-binding protein 1                                      | YBX1     | 36 kDa   | 0.4 |
|                                                                                   |          |          |     |
| Fermitin family homolog 2                                                         | FERMT2   | 78 kDa   | 0.4 |
| Arginine--tRNA ligase, cytoplasmic                                                | RARS     | 75 kDa   | 0.4 |
| Importin subunit alpha-4                                                          | KPNA3    | 58 kDa   | 0.4 |
| Erythrocyte band 7 integral membrane protein                                      | STOM     | 32 kDa   | 0.4 |
| Glutathione S-transferase P                                                       | GSTP1    | 23 kDa   | 0.4 |
|                                                                                   | HSP90AB  |          |     |
| Heat shock protein HSP 90-beta                                                    | 1        | 83 kDa   | 0.4 |
| Tensin-1                                                                          | TNS1     | 186 kDa  | 0.4 |
| Elongin-C                                                                         | ELOC     | 12 kDa   | 0.4 |
| UV excision repair protein RAD23 homolog B                                        | RAD23B   | 43 kDa   | 0.4 |
| Ubiquitin-like modifier-activating enzyme 1                                       | UBA1     | 118 kDa  | 0.4 |
| E3 UFM1-protein ligase 1                                                          | UFL1     | 90 kDa   | 0.4 |
| Poly(rC)-binding protein 1                                                        | PCBP1    | 37 kDa   | 0.4 |
| Plasminogen activator inhibitor 1 RNA-binding protein                             | SERBP1   | 45 kDa   | 0.4 |
| Serpin B6                                                                         | SERPINB6 | 43 kDa   | 0.4 |
| Importin-5                                                                        | IPO5     | 124 kDa  | 0.4 |
| Alpha-adducin                                                                     | ADD1     | 81 kDa   | 0.4 |
| Branched-chain-amino-acid aminotransferase, cytosolic                             | BCAT1    | 43 kDa   | 0.4 |
| Multiple coagulation factor deficiency protein 2                                  | MCFD2    | 16 kDa   | 0.4 |
| Splicing factor, proline- and glutamine-rich                                      | SFPQ     | 76 kDa   | 0.4 |
| Valine--tRNA ligase                                                               | VAR5     | 140 kDa  | 0.4 |
| 40S ribosomal protein S15                                                         | RPS15    | 17 kDa   | 0.4 |
| Calcium-binding mitochondrial carrier protein SCaMC-1                             | SLC25A24 | 53 kDa   | 0.4 |
| Eukaryotic peptide chain release factor subunit 1                                 | ETF1     | 49 kDa   | 0.4 |
| Serine/threonine-protein phosphatase 2A 65 kDa regulatory subunit A alpha isoform | PPP2R1A  | 65 kDa   | 0.4 |
| ATP-dependent 6-phosphofructokinase, liver type                                   | PFKL     | 85 kDa   | 0.4 |
| Interleukin enhancer-binding factor 2                                             | ILF2     | 43 kDa   | 0.4 |
| Proteasome subunit alpha type-5                                                   | PSMA5    | 26 kDa   | 0.4 |
| DNA damage-binding protein 1                                                      | DDB1     | 127 kDa  | 0.4 |
| Adenylate kinase isoenzyme 1                                                      | AK1      | 22 kDa   | 0.4 |
| T-complex protein 1 subunit theta                                                 | CCT8     | 60 kDa   | 0.4 |

|                                                                  |         |         |     |
|------------------------------------------------------------------|---------|---------|-----|
|                                                                  | FAM129  |         |     |
| Niban-like protein 1                                             | B       | 84 kDa  | 0.4 |
| HLA class I histocompatibility antigen, A-3 alpha chain          | HLA-A   | 41 kDa  | 0.4 |
| Aspartate--tRNA ligase, cytoplasmic                              | DARS    | 57 kDa  | 0.4 |
| 60S ribosomal protein L35                                        | RPL35   | 15 kDa  | 0.4 |
| GTPase NRas                                                      | NRAS    | 21 kDa  | 0.4 |
| Proteasome subunit alpha type-1                                  | PSMA1   | 30 kDa  | 0.4 |
| Transketolase                                                    | TKT     | 68 kDa  | 0.4 |
| Nucleoprotein TPR                                                | TPR     | 267 kDa | 0.4 |
| Probable ATP-dependent RNA helicase DDX5                         | DDX5    | 69 kDa  | 0.3 |
| ATP-citrate synthase                                             | ACLY    | 121 kDa | 0.3 |
| Apoptosis inhibitor 5                                            | API5    | 59 kDa  | 0.3 |
| T-complex protein 1 subunit gamma                                | CCT3    | 61 kDa  | 0.3 |
| Glutathione S-transferase omega-1                                | GSTO1   | 28 kDa  | 0.3 |
| 60S ribosomal protein L26                                        | RPL26   | 17 kDa  | 0.3 |
| Golgi resident protein GCP60                                     | ACBD3   | 61 kDa  | 0.3 |
| ATP-dependent 6-phosphofructokinase, platelet type               | PFKP    | 86 kDa  | 0.3 |
| DNA-dependent protein kinase catalytic subunit                   | PRKDC   | 469 kDa | 0.3 |
| Pyrroline-5-carboxylate reductase 1, mitochondrial               | PYCR1   | 33 kDa  | 0.3 |
| Eukaryotic translation initiation factor 3 subunit B             | EIF3B   | 92 kDa  | 0.3 |
| Tyrosine--tRNA ligase, cytoplasmic                               | YARS    | 59 kDa  | 0.3 |
| SUN domain-containing protein 2                                  | SUN2    | 80 kDa  | 0.3 |
| Dolichol-phosphate mannosyltransferase subunit 1                 | DPM1    | 30 kDa  | 0.3 |
| Apolipoprotein L2                                                | APOL2   | 37 kDa  | 0.3 |
| LIM domain and actin-binding protein 1                           | LIMA1   | 85 kDa  | 0.3 |
| Peroxiredoxin-6                                                  | PRDX6   | 25 kDa  | 0.3 |
| Nucleolar RNA helicase 2                                         | DDX21   | 87 kDa  | 0.3 |
| T-complex protein 1 subunit beta                                 | CCT2    | 57 kDa  | 0.3 |
| T-complex protein 1 subunit epsilon                              | CCT5    | 60 kDa  | 0.3 |
| 26S proteasome regulatory subunit 6B                             | PSMC4   | 47 kDa  | 0.3 |
| Eukaryotic initiation factor 4A-1                                | EIF4A1  | 46 kDa  | 0.3 |
| Eukaryotic translation initiation factor 5                       | EIF5    | 49 kDa  | 0.3 |
| Histone deacetylase 2                                            | HDAC2   | 55 kDa  | 0.3 |
| 40S ribosomal protein S30                                        | FAU     | 7 kDa   | 0.3 |
| Matrix metalloproteinase-14                                      | MMP14   | 66 kDa  | 0.3 |
| ATP-binding cassette sub-family F member 2                       | ABCF2   | 71 kDa  | 0.3 |
| Purine nucleoside phosphorylase                                  | PNP     | 32 kDa  | 0.3 |
| Lupus La protein                                                 | SSB     | 47 kDa  | 0.3 |
| Inactive C-alpha-formylglycine-generating enzyme 2               | SUMF2   | 34 kDa  | 0.3 |
| Puromycin-sensitive aminopeptidase                               | NPEPPS  | 103 kDa | 0.3 |
|                                                                  | CDK5RAP |         |     |
| CDK5 regulatory subunit-associated protein 3                     | 3       | 57 kDa  | 0.3 |
| NADPH--cytochrome P450 reductase                                 | POR     | 77 kDa  | 0.3 |
| Serine/arginine-rich splicing factor 1                           | SRSF1   | 28 kDa  | 0.3 |
| Hsp90 co-chaperone Cdc37                                         | CDC37   | 44 kDa  | 0.3 |
| Lysosomal alpha-glucosidase                                      | GAA     | 105 kDa | 0.3 |
| Interferon-induced, double-stranded RNA-activated protein kinase | EIF2AK2 | 62 kDa  | 0.3 |
| Lon protease homolog, mitochondrial                              | LONP1   | 106 kDa | 0.3 |
| Double-stranded RNA-specific adenosine deaminase                 | ADAR    | 136 kDa | 0.3 |
| ATPase family AAA domain-containing protein 3A                   | ATAD3A  | 71 kDa  | 0.3 |
| 26S proteasome regulatory subunit 8                              | PSMC5   | 46 kDa  | 0.3 |
| D-3-phosphoglycerate dehydrogenase                               | PHGDH   | 57 kDa  | 0.3 |
| Transportin-1                                                    | TNPO1   | 102 kDa | 0.3 |
| X-ray repair cross-complementing protein 5                       | XRCC5   | 83 kDa  | 0.3 |
| Coatomer subunit delta                                           | ARCN1   | 57 kDa  | 0.3 |
| Splicing factor 3A subunit 1                                     | SF3A1   | 89 kDa  | 0.3 |
| Serine-threonine kinase receptor-associated protein              | STRAP   | 38 kDa  | 0.3 |

|                                                          |          |         |      |
|----------------------------------------------------------|----------|---------|------|
| Protein SEC13 homolog                                    | SEC13    | 36 kDa  | 0.2  |
| Coatmer subunit gamma-1                                  | COPG1    | 98 kDa  | 0.2  |
| Thyroid hormone receptor-associated protein 3            | THRAP3   | 109 kDa | 0.2  |
| Constitutive coactivator of PPAR-gamma-like protein 1    | FAM120A  | 122 kDa | 0.2  |
| Proteasome subunit alpha type-4                          | PSMA4    | 29 kDa  | 0.2  |
| Pentraxin-related protein PTX3                           | PTX3     | 42 kDa  | 0.2  |
| Transforming growth factor-beta-induced protein ig-h3    | TGFBI    | 75 kDa  | 0.2  |
| HLA class I histocompatibility antigen, Cw-7 alpha chain | HLA-C    | 41 kDa  | 0.2  |
| Golgi-associated plant pathogenesis-related protein 1    | GLIPR2   | 17 kDa  | 0.2  |
| GTP-binding nuclear protein Ran                          | RAN      | 24 kDa  | 0.2  |
| Fascin                                                   | FSCN1    | 55 kDa  | 0.2  |
| Eukaryotic translation initiation factor 3 subunit C     | EIF3C    | 105 kDa | 0.2  |
| Splicing factor 3B subunit 2                             | SF3B2    | 100 kDa | 0.2  |
| Eukaryotic initiation factor 4A-III                      | EIF4A3   | 47 kDa  | 0.2  |
| Bifunctional glutamate/proline--tRNA ligase              | EPRS     | 171 kDa | 0.2  |
| 26S proteasome non-ATPase regulatory subunit 13          | PSMD13   | 43 kDa  | 0.2  |
| T-complex protein 1 subunit delta                        | CCT4     | 58 kDa  | 0.2  |
| Stress-induced-phosphoprotein 1                          | STIP1    | 63 kDa  | 0.2  |
| Translationally-controlled tumor protein                 | TPT1     | 20 kDa  | 0.2  |
| Tryptophan--tRNA ligase, cytoplasmic                     | WARS     | 53 kDa  | 0.2  |
| Glucose-6-phosphate 1-dehydrogenase                      | G6PD     | 59 kDa  | 0.2  |
| Histone H1.2                                             | HIST1H1C | 21 kDa  | 0.2  |
| T-complex protein 1 subunit alpha                        | TCP1     | 60 kDa  | 0.2  |
| RuvB-like 1                                              | RUVBL1   | 50 kDa  | 0.2  |
| Coatmer subunit beta                                     | COPB1    | 107 kDa | 0.2  |
| Isoleucine--tRNA ligase, cytoplasmic                     | IARS     | 145 kDa | 0.2  |
| Serine--tRNA ligase, cytoplasmic                         | SARS     | 59 kDa  | 0.2  |
| Myosin light chain 1/3, skeletal muscle isoform          | MYL1     | 21 kDa  | 0.2  |
| EH domain-containing protein 4                           | EHD4     | 61 kDa  | 0.2  |
| Band 4.1-like protein 3                                  | EPB41L3  | 121 kDa | 0.2  |
| Asparagine--tRNA ligase, cytoplasmic                     | NARS     | 63 kDa  | 0.2  |
| Ras suppressor protein 1                                 | RSU1     | 32 kDa  | 0.2  |
| Coatmer subunit alpha                                    | COPA     | 138 kDa | 0.2  |
| Far upstream element-binding protein 2                   | KHSRP    | 73 kDa  | 0.2  |
| Lamin-B1                                                 | LMNB1    | 66 kDa  | 0.2  |
| Platelet-derived growth factor receptor beta             | PDGFRB   | 124 kDa | 0.2  |
| Eukaryotic translation initiation factor 3 subunit A     | EIF3A    | 167 kDa | 0.2  |
| Glycine--tRNA ligase                                     | GARS     | 83 kDa  | 0.1  |
| Threonine--tRNA ligase, cytoplasmic                      | TARS     | 83 kDa  | 0.1  |
| Splicing factor 3B subunit 1                             | SF3B1    | 146 kDa | 0.1  |
| High mobility group protein HMG-I/HMG-Y                  | HMG1     | 12 kDa  | 0.1  |
| Phosphoserine aminotransferase                           | PSAT1    | 40 kDa  | 0.1  |
| 14-3-3 protein eta                                       | YWHAH    | 28 kDa  | 0.1  |
| T-complex protein 1 subunit eta                          | CCT7     | 59 kDa  | 0.1  |
| Transcription intermediary factor 1-beta                 | TRIM28   | 89 kDa  | 0.08 |

**Supplementary Table S6. Upstream analysis of DEPs (P12/P4 hASCs)**

| Upstream Regulator      | Molecule Type                                           | Predicted Activation State | Activation z-score | p-value of overlap | Target molecules in dataset                                                                                                                                                                                                                                                                                  |
|-------------------------|---------------------------------------------------------|----------------------------|--------------------|--------------------|--------------------------------------------------------------------------------------------------------------------------------------------------------------------------------------------------------------------------------------------------------------------------------------------------------------|
| ST1926                  | chemical drug                                           | Activated                  | 4.69               | 1.06E-14           | ARPC3,CCT2,CCT3,CCT6A,DYNLL1,EEF2,EIF3D,EIF4A1,EIF5A,ENO1,ILF2,NACA,NARS,PCBP2,PSMA4,PSMB1,RPS10,RPS15,SEPT7,SRP72,TPT1,YBX1                                                                                                                                                                                 |
| CD 437                  | chemical drug                                           | Activated                  | 4.6                | 2.01E-15           | API5,ARPC3,ATP5F1C,CCT2,CCT3,CCT6A,EEF2,EIF3D,EIF4A1,EIF5A,ENO1,FSCN1,HLA-C,HNRNPA1,ILF2,NACA,NARS,PCBP1,PCBP2,PSMA4,PSMB1,RPS10,RPS15,SEPT7,YBX1                                                                                                                                                            |
| 5-fluorouracil          | chemical drug                                           | Activated                  | 4.14               | 1.57E-10           | ATP5F1C,CCT3,CCT4,CCT6A,EEF2,EIF3C,EIF4A1,GARS,HNRNPA1,HSP90AB1,IARS,ILF2,NACA,PCBP1,PSMA7,PSMB1,PSMD2,RPL35,RPS28,SERPINB6,SSB,YBX1                                                                                                                                                                         |
| valproic acid           | chemical drug                                           | Activated                  | 3.534              | 6.3E-09            | ATP2B4,BAG2,FSCN1,HNRNPA1,ICAM1,LIMA1,PDGFRB,PSMA1,PSMA4,PSMA5,PSMA7,PSMB1,PSMB4,PSMC2,PSMC3,PSMC4,PSMC5,PSMD13,PSMD14,PSMD2,PSMD4,PTX3,SERPINE1,SRSF1,TNS1,UTRN,Y WHAH                                                                                                                                      |
| CST5                    | other                                                   | Activated                  | 2.982              | 8.61E-08           | ABCC1,CEMP1,COL12A1,DDX21,DHX9,HNRNPU,MSN,MYL9,PCBP1,PDLM5,PRPF8,PUF60,RBM3,RSL1D1,RTN3,SRSF1,SRSF9,TARDBP,VAR5                                                                                                                                                                                              |
| sirolimus               | chemical drug                                           | Activated                  | 2.878              | 5.59E-16           | ACTA2,ATP2B4,ATP5F1C,COL1A1,CTGF,EEF1A1,EEF2,EIF2AK2,EIF4A1,EIF5,ENO1,FSCN1,FUS,G6PD,GSTP1,HIST1H4A,HLA-B,HNRNPU,HSP90AB1,ICAM1,MMP14,NDUFA9,PDGFRB,PFKP,PLIN2,PSMA4,PSMB1,PSMB4,RAN,RPL35,RPS10,RPS15,SERPINE1,SLC1A5,SLC2A1,TARS,TPM3,TRIM25,UBA1                                                          |
| mir-122                 | microRNA                                                | Activated                  | 2.714              | 1.62E-07           | ACTR1A,CSR1,G6PD,MAPR1,NPEPPS,NUTF2,RBM3,SERPINB6,SLC1A5,WARS,YARS                                                                                                                                                                                                                                           |
| KLF3                    | transcription regulator                                 | Activated                  | 2.714              | 0.0131             | CCT3,EIF5A,EPRS,GLIPR2,GSTP1,MSN,PFKP,PSMC5,RUVBL1,SEC24D,TPM3                                                                                                                                                                                                                                               |
| RICTOR                  | other                                                   | Activated                  | 2.711              | 1.17E-11           | ATP5F1C,ATP6V0A1,ATP6V0D1,FAU,NDUFA9,PPA1,PSMA1,PSMA4,PSMA5,PSMA7,PSMB1,PSMB4,PSMC2,PSMC3,PSMC4,PSMC5,PSMD13,PSMD14,PSMD2,PSMD4,RPL26,RPS10,RPS15                                                                                                                                                            |
| EDN1                    | cytokine                                                | Activated                  | 2.542              | 3.28E-06           | ACTA2,BAG2,CTGF,ICAM1,ITGA2,ITGB1,MPRIIP,MSN,SERPINE1,SF3B2,SLC2A1,TPM2,TPM3,TPT1                                                                                                                                                                                                                            |
| cigarette smoke         | chemical toxicant                                       | Activated                  | 2.434              | 0.000513           | ACTA2,CCT5,CKB,G6PD,GSTP1,HDAC2,ICAM1,SERPINE1,SLC2A1,SOD2,TCP1,UGDH                                                                                                                                                                                                                                         |
| fatty acid              | chemical - endogenous mammalian transcription regulator | Activated                  | 2.414              | 0.00566            | ACOX1,ATP5F1C,PLIN2,PPA1,SERPINE1,SLC2A1                                                                                                                                                                                                                                                                     |
| SRF                     | chemical - endogenous mammalian transcription regulator | Activated                  | 2.394              | 0.0061             | ACTA2,CAPRIN1,CNN1,CSR1,CSR2,CTGF,FERMT2,ITGB1,MYL1,MYL9,SLC2A1,TGFB11                                                                                                                                                                                                                                       |
| sphingosine-1-phosphate | chemical - endogenous mammalian                         | Activated                  | 2.366              | 0.0026             | ACTA2,CTGF,HDAC2,ICAM1,MMP14,SERPINE1                                                                                                                                                                                                                                                                        |
| tretinoin               | chemical - endogenous mammalian transcription regulator | Activated                  | 2.327              | 3.89E-07           | ACOX1,ADAR,CCT5,COL1A1,CTGF,DPP4,DYNLL1,ECI2,EEF1A1,EIF2AK2,EIF3B,EIF3C,EIF4A1,EIF4G1,EIF5,ELOC,FUBP3,GARS,GNA13,GSTP1,HLA-A,HLA-B,HLA-C,HMGAI1,ICAM1,ILF3,ITGA2,ITGB1,KRT14,LOXL2,MMP14,NME2,PDGFRB,PLIN2,PNP,POR,PSMC4,PTX3,RAD23B,RAI14,RAN,RUVBL1,SERPINE1,SERPINE2,TGFB1,TPR,TPT1,UBA1,XRCC5,XRCC6,YBX1 |
| RELA                    | chemical - kinase inhibitor                             | Activated                  | 2.302              | 0.0146             | ACTA2,ALCAM,COL1A1,CTGF,FSCN1,HLA-B,ICAM1,KRT8,PRDX6,PTX3,SERPINE2,SOD2,STIM1                                                                                                                                                                                                                                |
| IND S7                  | chemical - kinase inhibitor                             | Activated                  | 2.236              | 6.68E-05           | ENO1,HNRNPL,KHSRP,PSMA1,STIP1                                                                                                                                                                                                                                                                                |
| MEL S3 4-               | chemical - kinase inhibitor                             | Activated                  | 2.236              | 7.97E-05           | ENO1,HNRNPL,KHSRP,PSMA1,STIP1                                                                                                                                                                                                                                                                                |
| hydroxytamoxifen        | chemical drug                                           | Activated                  | 2.228              | 0.00786            | CTGF,DDX21,DYNLL1,EIF5A,GLRX,SLC25A4,SLC2A1,TNPO1                                                                                                                                                                                                                                                            |
| eicosapentenoic acid    | chemical drug                                           | Activated                  | 2.213              | 0.0148             | ECH1,PLIN2,PSMC2,SERPINE1,SLC2A1                                                                                                                                                                                                                                                                             |
| MRTFA                   | transcription regulator                                 | Activated                  | 2.204              | 0.0161             | ACTA2,CNN1,HLA-A,ICAM1,ITGB1,MYL9                                                                                                                                                                                                                                                                            |
| ITGB1                   | transmembrane receptor                                  | Activated                  | 2.184              | 0.0599             | ABCC1,ACTA2,COL1A1,ICAM1,SERPINE1                                                                                                                                                                                                                                                                            |



|                                                 |                                     |           |        |          |                                                                                                                                                                                                                                                                                                                                                                                             |
|-------------------------------------------------|-------------------------------------|-----------|--------|----------|---------------------------------------------------------------------------------------------------------------------------------------------------------------------------------------------------------------------------------------------------------------------------------------------------------------------------------------------------------------------------------------------|
| CDKN2A                                          | transcription regulator             | Activated | 2.158  | 0.0145   | AK1,CTGF,DDX5,EEF1A1,GNA13,PDGFRB,PSMA5,PTX3,SERPINE1,TRIM28                                                                                                                                                                                                                                                                                                                                |
| SMAD2                                           | transcription regulator             | Activated | 2.116  | 0.00206  | ACTA2,CTGF,ITGB1,SERPINE1,TPM2,TPM3                                                                                                                                                                                                                                                                                                                                                         |
| SFRP1                                           | transmembrane receptor              | Activated | 2      | 0.00886  | ACLY,ACTA2,COL1A1,SERPINE1                                                                                                                                                                                                                                                                                                                                                                  |
| CD3                                             | complex                             | Inhibited | -2.024 | 6.71E-09 | ATP5F1C,DPP4,EIF4A3,FKBP3,G6PD,GDI2,HDAC2,HNRNPA1,HNRNPR,ICAM1,ILF2,KRT14,LNPEP,LONP1,PCBP2,PLEC,PLIN2,PNP,PPA1,PSMA5,RAD23B,RARS,RBM3,SRSF1,SSB,STIM1,STOM,TAR                                                                                                                                                                                                                             |
| RUNX2                                           | transcription regulator             | Inhibited | -2.074 | 0.0394   | ACTA2,COL1A1,MMP14,NEXN,SERPINE1                                                                                                                                                                                                                                                                                                                                                            |
| EGFR                                            | kinase                              | Inhibited | -2.093 | 2.44E-07 | ACTA2,ATAD3A,CCT5,COL1A1,CTGF,EIF5A,HMGA1,HNRNPA1,ICAM1,ITGA2,MARCKS,MMP14,N                                                                                                                                                                                                                                                                                                                |
| tunicamycin                                     | chemical - endogenous non-mammalian | Inhibited | -2.099 | 0.00101  | ACOX1,HDLBP,ICAM1,ILK,LONP1,NARS,PLIN2,SEC24D,SLC2A1,WARS                                                                                                                                                                                                                                                                                                                                   |
| XBP1                                            | transcription regulator             | Inhibited | -2.137 | 0.00517  | ARCN1,COPB1,COPG1,FKBP7,ICAM1,MCFD2,SEC24D,SELENOM,XRCC6                                                                                                                                                                                                                                                                                                                                    |
| ATF4                                            | transcription regulator             | Inhibited | -2.148 | 2.74E-09 | BCAT1,GARS,IARS,NARS,PHGDH,PRKDC,PSAT1,PTX3,PYCR1,SARS,SHMT2,SLC1A5,SLC7A5,SOD2                                                                                                                                                                                                                                                                                                             |
| pimagedine                                      | chemical drug                       | Inhibited | -2.219 | 2.97E-05 | ACTA2,CNN1,CTGF,ICAM1,OPA1,SERPINE1                                                                                                                                                                                                                                                                                                                                                         |
| DDIT3                                           | transcription regulator             | Inhibited | -2.236 | 0.0348   | ITGA2,PLEC,SARS,SRSF1,WARS                                                                                                                                                                                                                                                                                                                                                                  |
| bortezomib                                      | chemical drug                       | Inhibited | -2.261 | 7.03E-05 | ABCF2,HDAC2,ICAM1,PSMA1,PSMA5,PSMA7,PSMB4,PSMC4,PSMD13,PSMD14,PSMD2,PSMD4,UF1                                                                                                                                                                                                                                                                                                               |
| simvastatin                                     | chemical drug                       | Inhibited | -2.341 | 0.044    | ACTA2,CTGF,HIST1H1C,ICAM1,MYH10,NONO,SERPINE1                                                                                                                                                                                                                                                                                                                                               |
| STAT6                                           | transcription regulator             | Inhibited | -2.619 | 0.191    | ACOX1,COL1A1,FSCN1,GNB4,MMP14,SERPINB6,SERPINE1,THY1                                                                                                                                                                                                                                                                                                                                        |
| NFE2L1                                          | transcription regulator             | Inhibited | -2.646 | 5.21E-07 | GSTP1,PSMA1,PSMA7,PSMB1,PSMC2,PSMC3,PSMD14                                                                                                                                                                                                                                                                                                                                                  |
| beta-estradiol                                  | chemical - endogenous mammalian     | Inhibited | -2.71  | 6.66E-10 | ACTA2,ACTA2,ALCAM,ATP2B1,BCAT1,CCT2,CKB,CNN1,COL1A1,CTGF,DDX17,DYNLL1,ECH1,EIF3A,EIF3B,EIF3D,ENOC,ENO1,EPB41L3,FARSA,FLOT1,G6PD,GARS,GDI2,GNS,GSTP1,HDAC2,HDLBP,HLA-A,HNRNPA1,HSP90AB1,IARS,ICAM1,ILF3,ITGA2,KRT8,LIMA1,NARS,NOP58,PDGFRB,PFKL,PLIN2,PNP,PSAT1,PSMA1,PSMB1,PSMC3,PTX3,PYCR1,RAN,RARS,RDH10,SLC12A4,SLC2A1,SLC7A5,SRSF1,STIP1,SYNE1,TARDBP,TARS,TIMM13,TPR,TRIM25,YARS,YWHAH |
| UCP1                                            | transporter                         | Inhibited | -2.789 | 4.79E-05 | CCT2,CCT3,CCT4,CCT5,CCT6A,CCT7,CCT8,CSR2,HSP90AB1,ICAM1,STIP1,TCP1                                                                                                                                                                                                                                                                                                                          |
| 2-amino-1-methyl-6-phenylimidazo-4-5-b-pyridine | chemical toxicant                   | Inhibited | -3     | 1.79E-08 | EEF1A1,G6PD,GARS,GSTO1,PHGDH,PSAT1,PYCR1,SERPINE1,SHMT2                                                                                                                                                                                                                                                                                                                                     |
| MYCN                                            | transcription regulator             | Inhibited | -3.044 | 6.71E-14 | CCT2,CCT4,CCT5,CCT7,CCT8,PSMB1,PSMB4,RAN,UBA1                                                                                                                                                                                                                                                                                                                                               |
| MYC                                             | transcription regulator             | Inhibited | -3.242 | 4.71E-18 | ABCC1,ABCC4,ABCF2,ADD1,ALCAM,ATAD3A,BCAT1,CCT3,COL1A1,CSR2,DDX21,DDX39B,DDX5,EEF2,EIF3D,EIF4A1,EIF4G1,ENO1,G6PD,GAA,GDI2,GFPT1,GGH,GPI,HDAC2,HLA-A,HLA-B,HMGA1,HNRNPA1,HNRNPU,ICAM1,ITGB1,KRT14,LIMA1,MSN,MYL9,NARS,NME2,NOP58,PDGFRB,PFKL,PFKP,PSAT1,PYCR1,RARS,RPL26,RPL35,RUVBL1,SERPINE1,SERPINE2,SHMT2,SLC1A5,SLC2A1,SLC7A5,SOD2,SRSF1,THY1,TKT,VAR5,YBX1                              |
| HSF2                                            | transcription regulator             | Inhibited | -3.317 | 6.98E-12 | CCT2,CCT3,CCT4,CCT5,CCT6A,CCT7,CCT8,PSMA1,PSMA5,PSMC4,TCP1                                                                                                                                                                                                                                                                                                                                  |
| NFE2L2                                          | transcription regulator             | Inhibited | -4.431 | 1.08E-19 | ABCC1,ABCC4,CCT3,CCT7,COL1A1,CTGF,DDX39B,DYNLL1,EIF3C,G6PD,GSTO1,GSTP1,HSP90AB1,MCFD2,NARS,PCBP1,PHGDH,PLIN2,PSAT1,PSMA1,PSMA4,PSMA5,PSMA7,PSMB1,PSMB4,PSMC3,PSMD13,PSMD14,PSMD4,RAN,RARS,RUVBL1,SERPINE1,SHMT2,SLC2A1,SOD2,STIP1,TKT,UGDH                                                                                                                                                  |
| 1,2-dithiol-3-thione                            | chemical reagent                    | Inhibited | -4.965 | 7.18E-19 | CCT3,CCT7,DDX39B,DYNLL1,EIF3C,EIF3D,GSTP1,HSP90AB1,MCFD2,NARS,PCBP1,PSAT1,PSMA1,PSMA4,PSMA5,PSMA7,PSMB1,PSMB4,PSMC2,PSMC3,PSMD13,PSMD14,PSMD4,RAN,RARS,RUVBL1,SOD2,STIP1                                                                                                                                                                                                                    |

**Supplementary Table S7. DEPs overlapped between P8/P4 and P12/P4 hASCs.** A total of 28 DEPs were overlapped with P4, P8 and P12 hASCs, 19 DEPs have the same changing trend between P8/P4 and P12/P4 comparisons.

| Protein name                                                                                                            | Gene name | Molecular Weight | Fold Change by p8/p4 | Fold Change by p12/p4 |
|-------------------------------------------------------------------------------------------------------------------------|-----------|------------------|----------------------|-----------------------|
| ADP/ATP translocase 1 OS=Homo sapiens OX=9606 GN=SLC25A4 PE=1 SV=4                                                      | ARPC3     | 21 kDa           | -2.5                 | -2.5                  |
| Actin-related protein 2/3 complex subunit 3 OS=Homo sapiens OX=9606 GN=ARPC3 PE=1 SV=3                                  | ASAH1     | 45 kDa           | -2                   | 2.9                   |
| Acid ceramidase OS=Homo sapiens OX=9606 GN=ASAH1 PE=1 SV=5                                                              | CNN1      | 33 kDa           | -3.3                 | 2.2                   |
| Calponin-1 OS=Homo sapiens OX=9606 GN=CNN1 PE=1 SV=2                                                                    | CSRP2     | 21 kDa           | -2.5                 | 4.4                   |
| Cysteine and glycine-rich protein 2 OS=Homo sapiens OX=9606 GN=CSRP2 PE=1 SV=3                                          | CTSA      | 54 kDa           | 2.7                  | 3.8                   |
| Drebrin-like protein OS=Homo sapiens OX=9606 GN=DBNL PE=1 SV=1                                                          | DBNL      | 48 kDa           | -2.5                 | -2.5                  |
| Delta(3,5)-Delta(2,4)-dienoyl-CoA isomerase, mitochondrial OS=Homo sapiens OX=9606 GN=ECH1 PE=1 SV=2                    | ECH1      | 36 kDa           | 3.8                  | 2.7                   |
| Enoyl-CoA delta isomerase 2, mitochondrial OS=Homo sapiens OX=9606 GN=ECI2 PE=1 SV=4                                    | ECI2      | 44 kDa           | 5.2                  | 2.5                   |
| Flotillin-1 OS=Homo sapiens OX=9606 GN=FLOT1 PE=1 SV=3                                                                  | FLOT1     | 47 kDa           | 2.2                  | 5.5                   |
| Glutamine--fructose-6-phosphate aminotransferase [isomerizing] 1 OS=Homo sapiens OX=9606 GN=GFPT1 PE=1 SV=3             | GFPT1     | 79 kDa           | -2                   | -2.5                  |
| Keratin, type I cytoskeletal 14 OS=Homo sapiens OX=9606 GN=KRT14 PE=1 SV=4                                              | KRT14     | 52 kDa           | 6.6                  | 18                    |
| Keratin, type II cytoskeletal 8 OS=Homo sapiens OX=9606 GN=KRT8 PE=1 SV=7                                               | KRT8      | 54 kDa           | 3.3                  | -2                    |
| Lon protease homolog, mitochondrial OS=Homo sapiens OX=9606 GN=LONP1 PE=1 SV=2                                          | LONP1     | 106 kDa          | 2.6                  | -3.3                  |
| Microtubule-associated protein RP/EB family member 1 OS=Homo sapiens OX=9606 GN=MAPRE1 PE=1 SV=3                        | MAPRE1    | 30 kDa           | -2.5                 | -2.5                  |
| Myosin-10 OS=Homo sapiens OX=9606 GN=MYH10 PE=1 SV=3                                                                    | MYH10     | 229 kDa          | -3.3                 | 4.4                   |
| Myosin light chain 1/3, skeletal muscle isoform OS=Homo sapiens OX=9606 GN=MYL1 PE=2 SV=3                               | MYL1      | 21 kDa           | -5                   | -5                    |
| NADH dehydrogenase [ubiquinone] 1 alpha subcomplex subunit 9, mitochondrial OS=Homo sapiens OX=9606 GN=NDUFA9 PE=1 SV=2 | NDUFA9    | 943 kDa          | 2.2                  | 2                     |
| Pyrroline-5-carboxylate reductase 1, mitochondrial OS=Homo sapiens OX=9606 GN=NPEPPS PE=1 SV=2                          | NPEPPS    | 103 kDa          | -2.5                 | -3.3                  |
| ATP-dependent 6-phosphofructokinase, platelet type OS=Homo sapiens OX=9606 GN=PFKP PE=1 SV=2                            | PFKP      | 86 kDa           | -2.5                 | -3.3                  |
| Polycystin-2 OS=Homo sapiens OX=9606 GN=PKD2 PE=1 SV=3                                                                  | PKD2      | 110 kDa          | 2.1                  | 2.6                   |
| Purine nucleoside phosphorylase OS=Homo sapiens OX=9606 GN=PNP PE=1 SV=2                                                | PNP       | 32 kDa           | -3.3                 | -3.3                  |
| Lysosomal protective protein OS=Homo sapiens OX=9606 GN=PYCR1 PE=1 SV=2                                                 | PYCR1     | 33 kDa           | 2.7                  | -3.3                  |
| Puromycin-sensitive aminopeptidase OS=Homo sapiens OX=9606 GN=NPEPPS PE=1 SV=2                                          | RPL26     | 17 kDa           | -2                   | -3.3                  |
| 60S ribosomal protein L26 OS=Homo sapiens OX=9606 GN=RPL26 PE=1 SV=1                                                    | RRAS2     | 23 kDa           | 2.4                  | 5.3                   |
|                                                                                                                         | SLC25A4   |                  |                      |                       |
| Ras-related protein R-Ras2 OS=Homo sapiens OX=9606 GN=RRAS2 PE=1 SV=1                                                   | 4         | 33 kDa           | -2.5                 | 3.1                   |
| Sorbin and SH3 domain-containing protein 2 OS=Homo sapiens OX=9606 GN=SORBS2 PE=1 SV=3                                  | SORBS2    | 124 kDa          | -2.5                 | 5.1                   |
| Mitochondrial import inner membrane translocase subunit Tim13 OS=Homo sapiens OX=9606 GN=TIMM13 PE=1 SV=1               | TIMM13    | 11 kDa           | 2.5                  | 2.8                   |
| Ubiquitin carboxyl-terminal hydrolase 5 OS=Homo sapiens OX=9606 GN=USP5 PE=1 SV=2                                       | USP5      | 96 kDa           | -2.5                 | -3.3                  |
